# Supplementary material for: Non-Linear and Flexible Regions of the Human Notch1 Extracellular Domain Revealed by High-Resolution Structural Studies
Source: PubMed Central journal article supplement (PMC4826273; doi:10.1016/j.str.2016.02.010), 2016-04-05
Supplement: mmc2.pdf [file mmc2.pdf]

# Structure

## Non-Linear and Flexible Regions of the Human Notch1 Extracellular Domain Revealed by High-Resolution Structural Studies

### Graphical Abstract

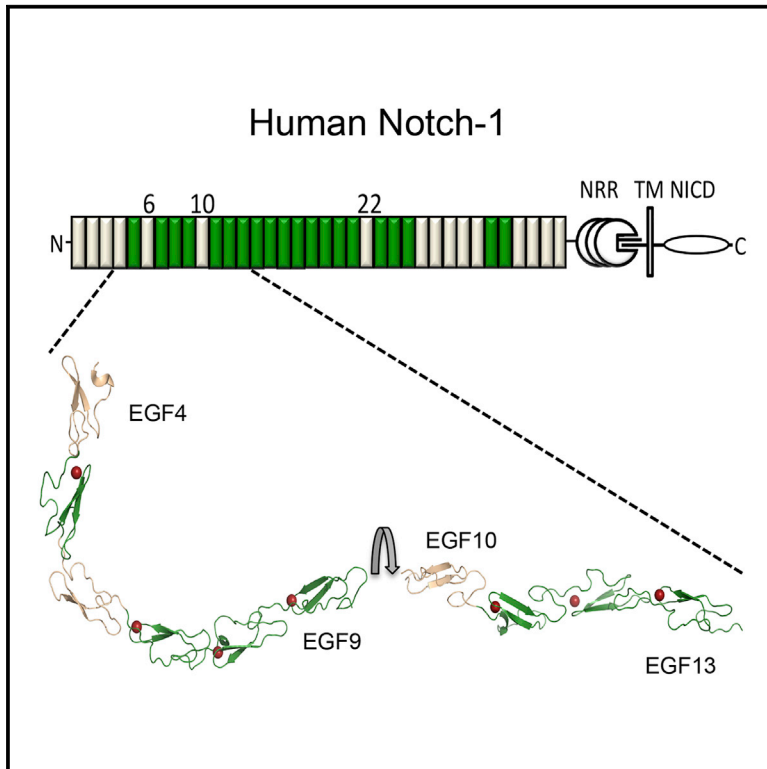

### Authors

Philip C. Weissshuhn, Devon Sheppard,  
Paul Taylor, Pat Whiteman,  
Susan M. Lea, Penny A. Handford,  
Christina Redfield

### Correspondence

penny.handford@bioch.ox.ac.uk (P.A.H.),  
christina.redfield@bioch.ox.ac.uk (C.R.)

### In Brief

The structure of the extracellular domain of Notch receptor is key to understanding Notch biology. Weissshuhn et al. identify both bent and flexible regions within the receptor, changing the classical view of the receptor as a rigid linear structure extending from the cell surface.

### Highlights

- The EGF4-13 region of human Notch1 contains both bent and flexible interfaces
- This changes the classical view of the receptor as a rigid linear structure
- Extra interaction sites of Notch with ligand may occur along its longitudinal axis
- Interfaces next to ligand-binding site differentially modulate ligand interactions

### Accession Numbers

5FMA  
5FM9

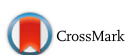

# Non-Linear and Flexible Regions of the Human Notch1 Extracellular Domain Revealed by High-Resolution Structural Studies

Philip C. Weisshuhn,<sup>1</sup> Devon Sheppard,<sup>2</sup> Paul Taylor,<sup>1</sup> Pat Whiteman,<sup>1</sup> Susan M. Lea,<sup>2</sup> Penny A. Handford,<sup>1,\*</sup> and Christina Redfield<sup>1,\*</sup>

<sup>1</sup>Department of Biochemistry, University of Oxford, South Parks Road, Oxford OX1 3QU, UK

<sup>2</sup>Sir William Dunn School of Pathology, University of Oxford, South Parks Road, Oxford OX1 3RE, UK

\*Correspondence: penny.handford@bioch.ox.ac.uk (P.A.H.), christina.redfield@bioch.ox.ac.uk (C.R.)

<http://dx.doi.org/10.1016/j.str.2016.02.010>

This is an open access article under the CC BY license (<http://creativecommons.org/licenses/by/4.0/>).

## SUMMARY

The Notch receptor is a key component of a core metazoan signaling pathway activated by Delta/Serrate/Lag-2 ligands expressed on an adjacent cell. This results in a short-range signal with profound effects on cell-fate determination, cell proliferation, and cell death. Key to understanding receptor function is structural knowledge of the large extracellular portion of Notch which contains multiple repeats of epidermal growth factor (EGF)-like domains. Here we investigate the EGF4-13 region of human Notch1 (hN1) using a multidisciplinary approach. Ca<sup>2+</sup>-binding measurements, X-ray crystallography, {<sup>1</sup>H}-<sup>15</sup>N heteronuclear nuclear Overhauser effects, and residual dipolar couplings support a non-linear organization for the EGF4-7 and a single flexible linkage between EGF9 and EGF10. These data allow us to construct an informed model for EGF10-13 which, in conjunction with comparative binding studies, demonstrates that EGF10 has an important role in determining Notch receptor sensitivity to Dll-4.

## INTRODUCTION

The Notch pathway plays a key role in cell-fate determination, cell proliferation, and apoptosis during development with a crucial impact on most tissues and organs (Artavanis-Tsakonas et al., 1999; Bray, 2006). In adults, Notch has key roles in tissue homeostasis by regulating stem cell maintenance and function, immune system activation, and angiogenesis. The importance of the Notch pathway for human biology is underscored by the number of diseases resulting from its inappropriate activation or inhibition, including a number of inherited disorders and cancers (Louvi and Artavanis-Tsakonas, 2012; Ntziachristos et al., 2014).

Notch signaling requires cell-surface expression of a heterodimeric transmembrane Notch receptor, which has a large extracellular portion rich in epidermal growth factor (EGF)-like domains (36 in human Notch1 and *Drosophila* Notch) (Figure 1A). Ligand

binding to Notch EGF11-12 by one of the two DSL ligand families (Jagged/Serrate or Delta) initiates regulated intramembrane proteolysis, where the receptor is cleaved within the negative regulatory region (NRR) by an ADAM metalloprotease and subsequently by the  $\gamma$ -secretase enzyme complex (Blauemüller et al., 1997; Gordon et al., 2007; Logeat et al., 1998; Sanchez-Irizarry et al., 2004). The final intramembrane cleavage releases the intracellular domain of Notch, which comprises RAM, ANK, and PEST sequences (Mumm and Kopan, 2000; Schroeter et al., 1998). This translocates to the nucleus, binds to a transcription factor of the CBF1, Suppressor of Hairless, Lag-1 (CSL) family, and, in the presence of co-activators such as Mastermind (MAM), relieves repression of genes of the HES and Hey families (Jarriault et al., 1995).

Interactions with the Notch receptor can activate or inhibit Notch signaling, dependent upon whether cell-surface ligands are presented to Notch on adjacent cells (*in trans*), or on the same cell (*in cis*) (deCelis and Bray, 1997; Franklin et al., 1999). Notch ligand activity is also sensitive to the modification of O-fucosylated Notch by Fringe (Moloney et al., 2000a, 2000b; Rana and Haltiwanger, 2011; Shao et al., 2003). This can potentiate or prevent signaling by different ligands and this post-translational regulation is important in controlling embryonic patterning and boundary formation between adjacent developmental compartments (Johnston et al., 1997). In addition, O-glucosylation of Notch has been shown to be essential for activity (Acar et al., 2008).

Structural studies have informed on the ligand-binding EGF11-13 (Cordle et al., 2008a; Hambleton et al., 2004) and the NRR (Gordon et al., 2007) regions of the extracellular domain of Notch. Furthermore, the structure of the transcriptional complex formed by CSL, Notch intracellular domain (NICD), and MAM in combination with DNA has been solved (Nam et al., 2006; Wilson and Kovall, 2006); however, most of the extracellular region remains unsolved. New structural information for the EGF-rich regions of the receptor and, in particular, those flanking the ligand-binding region are essential to gain mechanistic insight into the processes of receptor activation and inhibition that occur when ligand is expressed *in trans* or *in cis*, respectively, and to explain the effects of various mutations and post-translational modifications such as O-glycosylation. The three EGF domains of the ligand-binding site all adopt a canonical EGF fold and each contains a Ca<sup>2+</sup>-binding site at its N terminus, which together with a conserved hydrophobic packing interaction results in a near-linear and rigid conformation (Cordle et al., 2008a; Hambleton

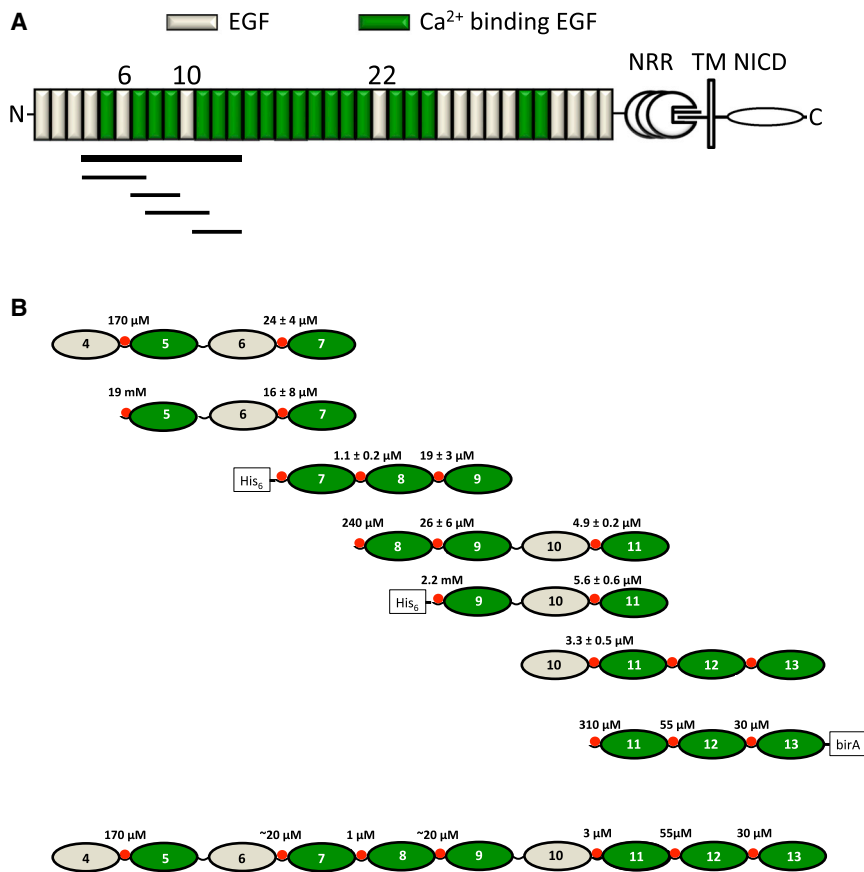

**Figure 1. Modular Organization of the Extracellular Domain of Human Notch1 and Overview of  $\text{Ca}^{2+}$  Dissociation Constants**

(A) The negative regulatory region (NRR) and transmembrane domain (TM) of Notch1 are indicated. Individual domains belonging to the Notch intracellular domain (NICD) are not indicated separately.  $\text{Ca}^{2+}$ -binding and non- $\text{Ca}^{2+}$ -binding EGF domains are indicated in green and wheat, respectively. The thick horizontal black line highlights the EGF4-13 region that is the subject of this study. The shorter lines indicate the principal constructs used here (EGF4-7, EGF7-9, EGF8-11, and EGF11-13).

(B) The measured  $\text{Ca}^{2+}$  dissociation constants at pH 7.5 and  $I = 0.15$  for all the constructs studied are shown.  $K_d$  values in the 1–20  $\mu\text{M}$  range were determined by chromophoric chelation; at least three repeats were carried out and the experimental errors on the  $K_d$  values are shown.  $K_d$  values in the 20  $\mu\text{M}$  to mM range were determined by NMR; repeat experiments were not carried out.  $\text{Ca}^{2+}$  is indicated by a red sphere at the N terminus of each  $\text{Ca}^{2+}$ -binding EGF domain. EGF11-13 contains a recognition sequence for the site-specific biotinylation enzyme BirA at its C terminus. The N-terminal His<sub>6</sub> tag has not been cleaved from EGF7-9 and EGF9-11.

See also [Figures S1 and S4](#).

[et al., 2004](#)). Many of the other EGF domains are predicted to bind  $\text{Ca}^{2+}$  and, by homology to known structures, are expected to adopt extended inflexible structures similar to EGF11-13 ([Downing et al., 1996](#); [Handford et al., 1991](#); [Rees et al., 1988](#)). However, the multiple tandem repeats of  $\text{Ca}^{2+}$ -binding EGF-like domains are interspersed with non- $\text{Ca}^{2+}$ -binding domains EGF6, EGF10, and EGF22, which may introduce sites of flexibility or adopt non-linear pairwise domain interactions ([Figure 1A](#)). An electron microscopy study suggested the existence of a Notch dimer with distinct conformational states ([Kelly et al., 2010](#)) but these data were obtained using affinity grid immobilization without conventional protein purification, and the  $\text{Ca}^{2+}$  concentration was ill defined. A “jack-knife” model for the receptor has been proposed to explain the genetic data ([Xu et al., 2005](#)), but there is as yet no direct experimental evidence for this, and a conformation that extends the receptor ectodomain away from the cell surface toward the ligand is also possible. Recently, the structure of EGF11-13 in complex with the N-terminal fragment of Dll-4 (NE1) has been reported, which shows the two molecules in an antiparallel orientation within the crystal ([Luca et al., 2015](#)). Furthermore, two distinct sites within EGF11-12 were shown to bind to Dll-4, with specific residues within EGF12 binding to the N-terminal C2 domain of the ligand and EGF11 residues making contacts with the DSL domain.

In this study, we have used nuclear magnetic resonance (NMR) spectroscopy and X-ray crystallography to investigate

the structure and flexibility of the EGF4-13 region of the Notch ectodomain by analyzing a series of limited fragments with the non- $\text{Ca}^{2+}$ -binding EGF6 and

EGF10 domains placed in a native context ([Figure 1A](#)). We report a crystal structure of EGF4-7, where the domain interface formed between the non- $\text{Ca}^{2+}$ -binding domain, EGF6, and its preceding domain introduces a bent conformation to the region. Residual dipolar coupling measurements are used to define interdomain orientations for other domain pairs in EGF4-13 and identify a single site of flexibility at the EGF9-10 linker. These data, together with  $\text{Ca}^{2+}$ -binding and  $\{^1\text{H}\} - ^{15}\text{N}$  heteronuclear nuclear Overhauser effect (NOE) measurements, allow modeling of EGF4-13, which suggests a non-linear, but not jack-knifed, organization. Superposition of EGF10-13 on EGF11-13 of the recently solved Notch/Dll-4 complex indicates that further interaction sites with ligand outside the core recognition site are possible, notably at EGF10/EGF1. Comparative binding analyses, by flow cytometry, indicate that the presence of EGF10 modulates the ability of the core recognition site to interact with Dll-4, but not Jagged1 (J1), revealing greater complexity to the molecular basis of ligand specificity than previously thought.

## RESULTS

### **$\text{Ca}^{2+}$ -Binding Measurements Reveal Rigid Interfaces for $\text{Ca}^{2+}$ -Binding EGF Domains in the EGF4-13 Region of Human Notch1**

$\text{Ca}^{2+}$  affinities for  $\text{Ca}^{2+}$ -binding (cb) EGF domains of the EGF4-13 region of human Notch1 were measured to gain insight into

**Table 1. Crystallization and Structure Determination for hN1 EGF4-7**

| Space Group                                          | P2 <sub>1</sub>           | C2                        |
|------------------------------------------------------|---------------------------|---------------------------|
| Cell                                                 |                           |                           |
| a, b, c (Å)                                          | 40.94, 86.83,<br>53.45    | 142.26, 21.15,<br>83.56   |
| α, β, γ (°)                                          | 90, 107, 90               | 90, 116.27, 90            |
| Wavelength (Å)                                       | 1.74626                   | 1.74626                   |
| Resolution (Å)                                       | 43.42–2.46<br>(2.69–2.46) | 64.73–2.92<br>(3.26–2.92) |
| R <sub>merge</sub> (%)                               | 3.0 (38.8)                | 3.1 (36.8)                |
| I/σI                                                 | 23.6 (2.3)                | 17.4 (2.1)                |
| Completeness (%)                                     | 89.9 (93.8)               | 95.0 (98.0)               |
| Redundancy                                           | 3.3                       | 3                         |
| Number of reflections                                | 39,951                    | 15,128                    |
| R <sub>work</sub> /R <sub>free</sub> (%)             | 25.9/26.3                 | 21.4/23.7                 |
| Number of atoms                                      |                           |                           |
| Protein                                              | 4,154                     | 2,099                     |
| Ligand/ion                                           | 29                        | 8                         |
| Water                                                | 18                        | 6                         |
| B factors                                            |                           |                           |
| Protein                                              | 69.2                      | 34.4                      |
| Ligand/ion                                           | 66.0                      | 40.5                      |
| Water                                                | 56.0                      | 17.3                      |
| RMS deviation                                        |                           |                           |
| Bond length (Å)                                      | 0.035                     | 0.01                      |
| Bond angles (°)                                      | 1.21                      | 1.23                      |
| Residues in allowed regions of Ramachandran plot (%) | 100                       | 100                       |
| Residues in favored regions of Ramachandran plot (%) | 97.3                      | 95.4                      |

the rigidity of interdomain interfaces in this region. In EGF domains, a consensus sequence of D/N-x-D/N-E/Q-x<sub>m</sub>-D/N\*-x<sub>n</sub>-Y/F (where \* indicates possible β-hydroxylation, and m/n are variable) is predictive for Ca<sup>2+</sup> binding (Handford et al., 1991; Mayhew et al., 1992; Rand et al., 2000; Rees et al., 1988). Chromophoric chelation was used to measure K<sub>d</sub> values for high-affinity sites (up to ~20 μM (Jensen et al., 2005; Linse et al., 1991)), while NMR titrations were used to measure K<sub>d</sub> values for low- and medium-affinity sites and to assign the high-affinity sites to specific EGF domains (Figure 1B) (Suk et al., 2004). Ca<sup>2+</sup>-binding EGF domains 5, 8, 11, 12, and 13 show the consensus Ca<sup>2+</sup> binding sequence and the aromatic packing residue in the preceding domains. EGF domains 7 and 9 have an aspartic acid instead of the expected E/Q at the third consensus site (Figure S1).

Ca<sup>2+</sup> affinities were measured in a number of constructs and the results are summarized in Figure 1B. N-terminal EGF domains have low affinity for Ca<sup>2+</sup>, and this is observed to increase when they are placed in a native context with a preceding EGF domain. For example, the affinity for Ca<sup>2+</sup> of EGF5 is increased by ~100-fold (from a K<sub>d</sub> of 19 mM to a K<sub>d</sub> of 170 μM) when it is preceded by EGF4. In the domains for which K<sub>d</sub>

**Table 2. Interdomain Tilt and Twist Angles Observed in X-Ray Structures and Obtained from RDC Data**

| X-Ray Structures <sup>a</sup> |             |                      |                       |
|-------------------------------|-------------|----------------------|-----------------------|
| Construct                     | Domain Pair | Range of Tilt Angles | Range of Twist Angles |
| EGF4-7                        | EGF4-5      | 33°–42°              | 179°–187°             |
| EGF4-7                        | EGF5-6      | 82°–92°              | 112°–123°             |
| EGF4-7                        | EGF6-7      | 25°–36°              | 146°–154°             |
| EGF11-13                      | EGF11-12    | 14°–18°              | 119°–141°             |
| EGF11-13                      | EGF12-13    | 10°–24°              | 132°–141°             |
| RDC data <sup>b</sup>         |             |                      |                       |
| Construct                     | Domain Pair | Tilt Angle           | Twist Angle           |
| EGF4-7                        | EGF4-5      | 48° ± 3°             | 190° ± 6°             |
| EGF4-7                        | EGF5-6      | 70° ± 2°             | 112° ± 7°             |
| EGF4-7                        | EGF6-7      | 30° ± 3°             | 153° ± 4°             |
| EGF7-9                        | EGF7-8      | 45° ± 2°             | 192° ± 17°            |
| EGF8-11                       | EGF8-9      | 14° ± 2°             | 142° ± 9°             |
| EGF8-11 <sup>c</sup>          | EGF9-10     | not defined          | not defined           |
| EGF8-11                       | EGF10-11    | 33° ± 10°            | 172° ± 3°             |
| EGF11-13                      | EGF11-12    | 19° ± 2°             | 133° ± 8°             |
| EGF11-13                      | EGF12-13    | 16° ± 1°             | 149° ± 9°             |

<sup>a</sup>The ranges in the tilt and twist angles (Downing et al., 1996) for EGF4-7 were obtained from the two protein molecules in the P2<sub>1</sub> unit cell and from the single molecule in the C2 unit cell. The ranges for EGF11-13 were obtained from several X-ray structures determined for EGF11-13 (PDB: 2VJ3, 4CUE, 4CUF, 4D0F, 4CUD, 4D0E).

<sup>b</sup>Errors in the angles are determined using an experimental error of 2 Hz for the RDCs as described in Supplemental Experimental Procedures (see also Figure S2, Tables S1 and S2).

<sup>c</sup>See also Figure S3.

values have been measured, only the presence of a preceding domain has an influence on the K<sub>d</sub> value. For example, EGF9 has the same K<sub>d</sub>, within experimental error, in the EGF7-9 and EGF8-11 constructs. The K<sub>d</sub> values for EGF domains 7, 8, 9, 11, 12, and 13 are in the range of ~1–60 μM, and under the conditions of extracellular Ca<sup>2+</sup> concentration (~1.4 mM) (Breitwieser, 2008) these sites will be saturated to >~95%. EGF5 has a weaker affinity for Ca<sup>2+</sup> (K<sub>d</sub> ~170 μM); this site will still be occupied in ~90% of molecules. The high Ca<sup>2+</sup> affinity observed for all the cbEGF domains (including EGF7 and EGF9, which have aspartic acid instead of the expected E/Q at the third consensus site), and the observation that the affinity is enhanced by at least a factor of 50 when a preceding domain is present, suggests that the cbEGF domains studied here form a packing interaction with the preceding domain leading to a rigid interdomain interface.

### Crystal Structure of Human Notch1 EGF4-7 Reveals a Bent Conformation

Structures of two crystal forms (P2<sub>1</sub> and C2) were determined for hN1 EGF4-7 using X-ray crystallography (Table 1). Each domain within the construct displayed a canonical EGF fold, with a single Ca<sup>2+</sup> bound, as expected, to EGF5 and EGF7 (Handford et al., 1991; Mayhew et al., 1992; Rees et al., 1988). An unusual tilt angle of ~80°–90° was observed at the domain interface of EGF5 and EGF6 for both crystal forms resulting in a bent

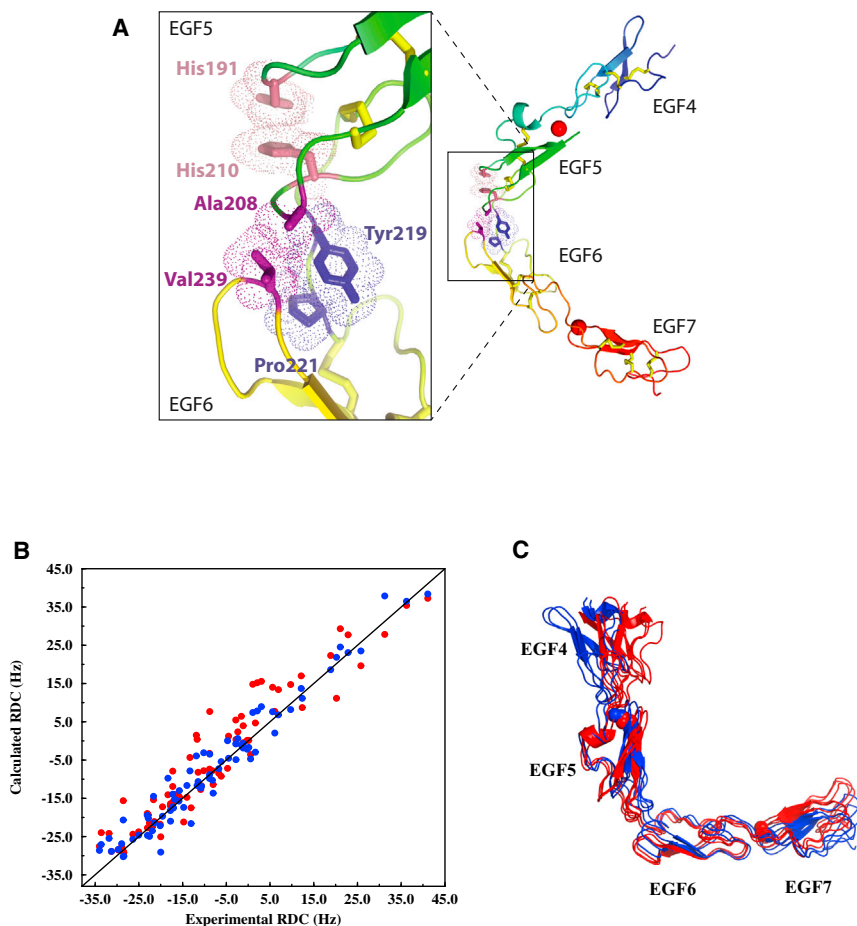

**Figure 2. Structure of EGF4-7 Reveals the Bent Conformation of the EGF5-6 Junction**

(A) X-Ray structures of EGF4-7 (total of three independent chains in two crystal forms) reveal a consistent bent structure with the EGF5-6 junction adopting an  $\sim 90^\circ$  tilt angle. The main panel shows a representative structure (chain A from the P<sub>21</sub> crystal form) in a cartoon representation colored from blue at the N terminus to red at the C terminus. Ca<sup>2+</sup> ions are shown as red spheres and the residues stabilizing the EGF5-6 junction highlighted in stick and van der Waals surface representations colored to highlight the side chains that pack together. The EGF5-6 junction is also shown in the zoom box with the same representation.

(B) Comparison of experimental RDCs for EGF4-7 to RDC values calculated using the X-ray structure (P<sub>21</sub>, A) (red circles) or a structure in which the EGF5-6 interdomain tilt angle was reduced from  $90^\circ$  to  $70^\circ$  (blue circles); the Q value decreases from 0.38 to 0.27 when the tilt angle is decreased.

(C) Overlay of the three X-ray structures (red) and RDC-modeled structures (blue) for EGF4-7; the two structures in blue represent the range of tilt angles obtained from the RDC data using Monte Carlo simulations with an experimental error of 2 Hz (see also Table S2). The Ca<sup>2+</sup> ions bound to EGF5 and EGF7 are shown as spheres.

See also Figure S2 and Tables S1 and S2.

conformation for this stretch of EGF domains (Table 2 and Figure 2A). The EGF5-6 domain interface is stabilized in this orientation by packing of the side chain of A208 (with some contribution of T209) in EGF5 with V239 from EGF6. A second packing interaction is also evident between Y219 and P221 at the N terminus of EGF6 (Figure 2A). These interactions are very different from the interdomain packing typically observed in cbEGF-cbEGF pairs, and EGF-cbEGF pairs, which involves a conserved aromatic residue located between the fifth and sixth cysteine in the N-terminal domain packing against residues on the major  $\beta$  hairpin of the C-terminal domain, resulting in a rod-shaped conformation (Cordle et al., 2008a; Downing et al., 1996; Hambleton et al., 2004; Smallridge et al., 2003). H210, which is located at the position of the conserved packing aromatic residue in EGF5, is instead involved in an intradomain interaction with H191 that helps to stabilize the loop containing A208. The EGF4-5 and EGF6-7 pairs adopt a more elongated conformation than observed for EGF5-EGF6, but these pairs are not as elongated as the previously determined structure for EGF11-13 (Table 2).

#### Heteronuclear NOE Measurements Show that Interdomain Linkers Are Not Flexible on a Fast Timescale

The  $\{^1\text{H}\}$ - $^{15}\text{N}$  heteronuclear NOE provides a method for identifying regions of the polypeptide backbone that undergo fast

NOE, characteristic of mobile residues, are observed for up to approximately four residues at the N terminus of each construct. EGF8 and EGF11 show reduced NOE values for some residues in the loop between the first and second cysteines. In both cases, this flexibility is observed when EGF8 or EGF11 is the N-terminal domain but also when it is preceded by EGF7 or EGF10. EGF8 and EGF11 have six residues in this loop in contrast to only four residues in Ca<sup>2+</sup>-binding EGF7, EGF9, EGF12, and EGF13 where flexibility is not observed. Other regions of the construct do not show evidence for fast timescale dynamics. In particular, the residues between the sixth cysteine of one domain and first cysteine of the following domain, which represent the interdomain linker, do not show evidence of low heteronuclear NOE ratios suggesting that interdomain flexibility, at least on a fast timescale (picosecond to nanosecond), is absent.

#### Interdomain Orientations Determined using Residual Dipolar Couplings

Residual dipolar couplings (RDCs) are a useful NMR parameter for assessing the relative orientations of protein domains in solution and for identifying interdomain dynamics on a wider range of timescales than the heteronuclear NOE (Braddock et al., 2001; Chen and Tjandra, 2012; Fischer et al., 1999; Prestegard et al., 2004; Tolman and Ruan, 2006).  $^1\text{H}^{\text{N}}-^{15}\text{N}$  RDCs were measured for EGF4-7, EGF7-9, EGF8-11, and EGF11-13 using C12E6/*n*-hexanol as the alignment medium (Figure S2, and Tables S1

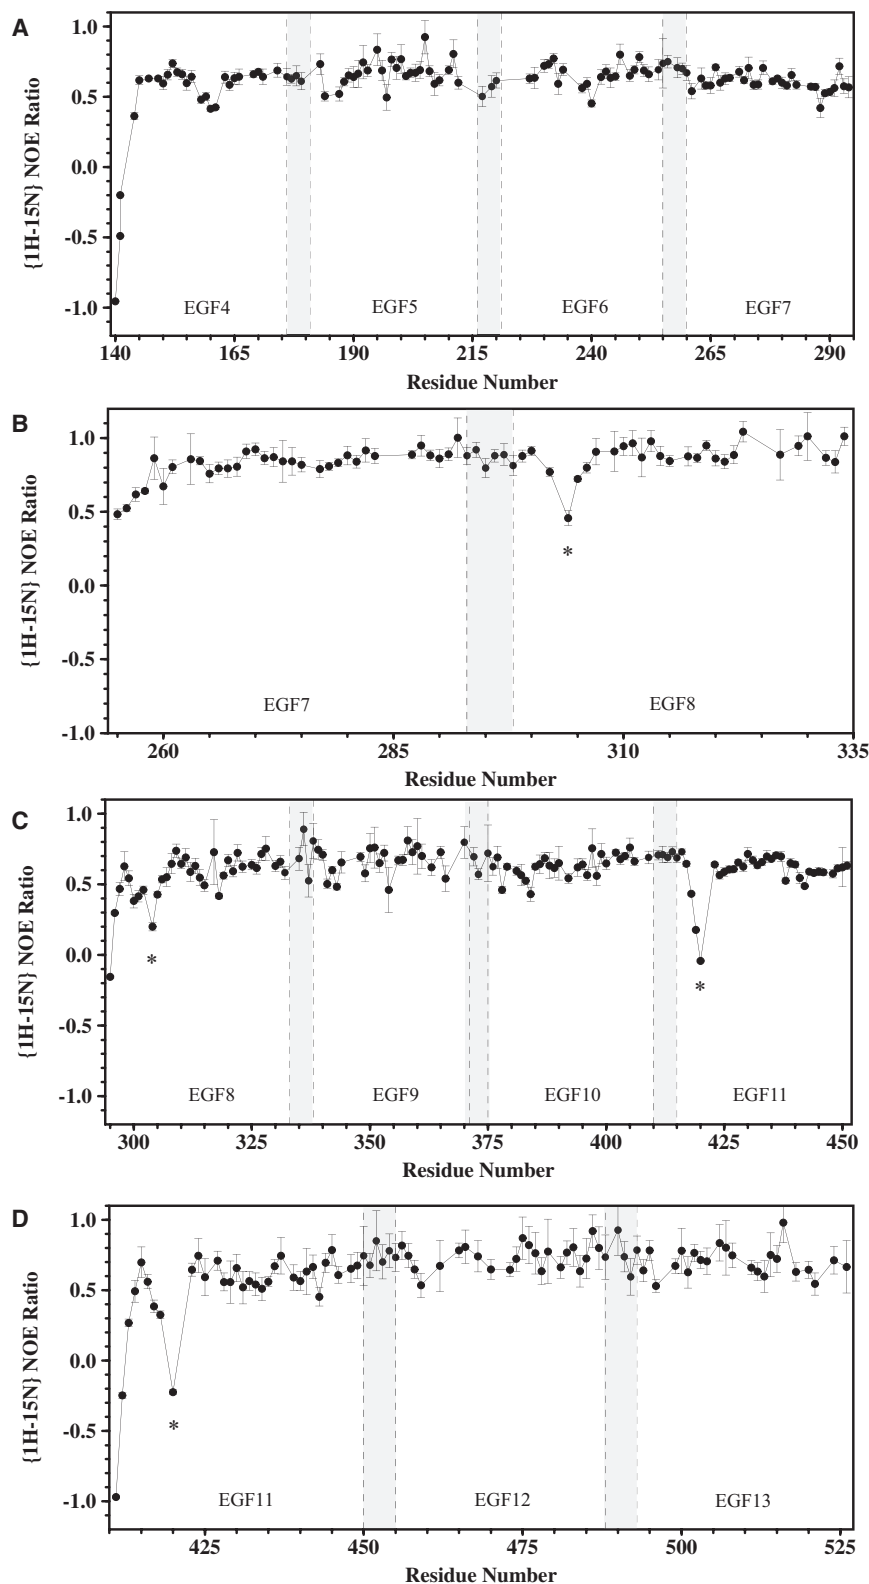

**Figure 3.  $\{^1\text{H}\}-^{15}\text{N}$  Heteronuclear NOE Data for hN1 Constructs**

(A–D) Data are shown for (A) EGF4–7, (B) EGF7–9, (C) EGF8–11 and (D) EGF11–13. Reduced NOE ratios, characteristic of significant mobility on a nanosecond to picosecond timescale, are observed at the N terminus of each construct and for the loop between the first and second Cys in EGF8 and EGF11 (indicated by an asterisk). The regions highlighted by the dashed vertical lines and shading represent the linker between pairs of EGF domains (six residues between the sixth Cys of one domain and the first cysteine of the next for all linkers except EGF9–10 which has five residues). It is clear that reduced NOE ratios are not observed in any of these linkers, indicating that they are not flexible on a fast timescale. EGF4 shows reduced NOE values for residues 158–161. These residues are located in the  $\beta$  turn between the third and fourth Cys; in the X-ray structures of EGF4–7 these residues show high B factors or missing electron density suggesting dynamic behavior. Uncertainties in the NOE ratios were estimated from 500 Monte Carlo simulations using baseline noise as a measure of the error in the peak heights.

**Well-Defined Interfaces Observed for all  $\text{Ca}^{2+}$ -Binding EGF Domains**

The RDC data demonstrate that all  $\text{Ca}^{2+}$ -binding EGF domains found in a native context have a well-defined and rigid interdomain interface; this is consistent with the conclusions from the  $\text{Ca}^{2+}$  affinity measurements. For the EGF4–5, EGF6–7, EGF11–12, and EGF12–13 pairs, the interdomain orientations in solution, as defined by the tilt and twist angles (Table 2), agree with the orientation observed in the X-ray structures of EGF4–7 and EGF11–13.

Crystal structures are not available for EGF7–9 and EGF8–11. The relative orientations of EGF8 and EGF9 with respect to EGF4–7 were determined from the RDCs measured for EGF7–9. The relative orientation of EGF10 with respect to EGF11–13 was determined from the RDCs measured for EGF8–11. The EGF7–8, EGF8–9, and EGF10–11 interfaces show the expected close proximity of the packing aromatic, found four residues after the fifth cysteine in the N-terminal domain, to the residues in the major  $\beta$  turn of the C-terminal domain (Figure S1); this packing interaction is expected in cbEGF domains with high affinity for  $\text{Ca}^{2+}$  as observed for

EGF8, EGF9, and EGF11 (Figure 1B). The EGF7–8 pair has a tilt angle of  $45^\circ$ , showing a less-extended conformation than observed for EGF11–13. This domain pair has a non-standard

and S2) (Ruckert and Otting, 2000). The interdomain tilt and twist angles determined using these RDC data are summarized in Table 2.

EGF8, EGF9, and EGF11 (Figure 1B). The EGF7–8 pair has a tilt angle of  $45^\circ$ , showing a less-extended conformation than observed for EGF11–13. This domain pair has a non-standard

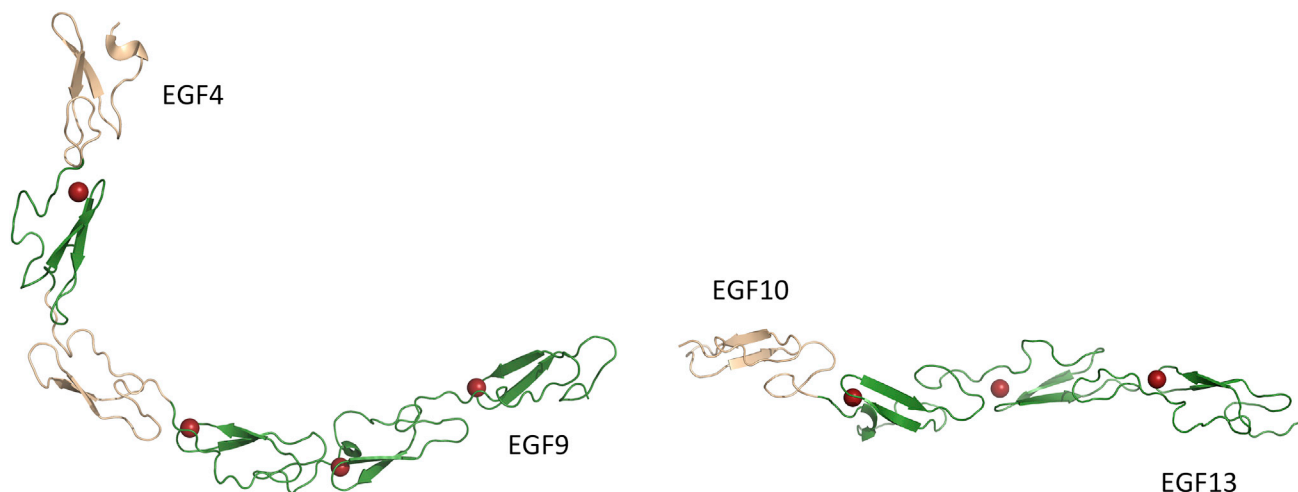

**Figure 4. Models for the EGF4-13 Region of Human Notch1**

The models for the EGF4-9 (left) and EGF10-13 (right) regions of human Notch1 are based on the X-ray structures of EGF4-7 and EGF11-13 and on the interdomain orientations determined using RDC data for EGF7-8, EGF8-9, and EGF10-11. The NMR data indicate that there is no fixed orientation of EGF9 relative to EGF10. Therefore, numerous relative orientations of EGF4-9 and EGF10-13 are possible. The  $\text{Ca}^{2+}$ -binding EGF domains are shown in green while the other EGF domains are shown in wheat. The  $\text{Ca}^{2+}$  ions bound in EGF5, EGF7, EGF8, EGF9, EGF11, EGF12, and EGF13 are shown as red spheres.

packing interaction involving W287 in EGF7 and H316 in the  $\beta$  hairpin of EGF8, rather than the more common hydrophobic residue; this may influence the interdomain orientation. EGF10 adopts a less-extended conformation with respect to EGF11 than the remainder of the EGF11-13 construct with a tilt angle of  $33^\circ \pm 10^\circ$ .

#### **EGF4-7 Is Bent in Solution**

The X-ray structure of the EGF4-7 construct shows an unusual bent structure with a tilt angle of  $\sim 80^\circ$ – $90^\circ$  between EGF5 and EGF6 (Figure 2A). The RDC data for EGF4-7 suggest that the molecule tumbles in solution as a rigid object. In solution, the EGF5-6 interface is also observed to be bent but is somewhat more open ( $70^\circ \pm 2^\circ$ ) than the crystal structures (Figures 2B and 2C).

#### **The EGF9-10 Interface Is Flexible**

Attempts to fit the RDC data for the four domains of EGF8-11 to a single alignment tensor result in a significantly higher Q value than the individual fits of EGF8-9 and EGF10-11 (Figure S3). In addition, the  $D_a$  values, which define the alignment tensor, obtained from the fits of the RDCs for EGF8-9 and EGF10-11 are significantly different in both their magnitude and sign ( $D_a = 14.9 \pm 0.5$  for EGF8-9 and  $D_a = -8.5 \pm 0.3$  for EGF10-11) (Table S2). This suggests that the two pairs of domains align independently in solution in the EGF8-11 construct; such a result has previously been interpreted as indicating medium-to-large-scale interdomain motion (Braddock et al., 2001). Thus the EGF9-10 interface appears to be flexible, which is in line with the prediction of EGF10 as a non- $\text{Ca}^{2+}$ -binding domain (Hambleton et al., 2004), the absence of an aromatic consensus residue at position four after the fifth cysteine in EGF9, and the prediction by TALOS+ (Shen et al., 2009), on the basis of  $^1\text{H}$ ,  $^{13}\text{C}$  and  $^{15}\text{N}$  chemical shifts, of lower order parameters for the residues at the beginning of EGF10. The absence of reduced heteronuclear NOE values for the EGF9-10 interface suggests that mobility of this interface is on a slower microsecond to millisecond timescale. Therefore,

within the EGF4-13 region of human Notch1, the EGF9-10 interface is the only site of significant interdomain flexibility.

#### **Model of EGF4-13 Region of Human Notch1**

The interdomain tilt and twist angles obtained from X-ray structures and RDC refinement allow a model for the EGF4-13 region to be constructed (Figure 4). As a result of the flexibility between EGF9 and EGF10, the model consists of two rigid segments, EGF4-9 and EGF10-13. Largely as a result of the bent interface between EGF5 and EGF6, EGF4-9 has an L shape with more extended structure in the EGF7-9 region. The model for EGF10-13 is more extended but there is a noticeable bend between EGF10 and EGF11 in contrast to the very linear EGF11-13 region.

A number of possible orientations will exist for EGF4-9 with respect to EGF10-13 as a result of the flexible EGF9-10 linker. A tight U-shaped structure has been reported for an EGF domain pair from the Merozoite surface protein 1 (Morgan et al., 1999). This structure contains a number of features not seen for Notch EGF domains including a seven-residue linker between domains and significantly longer loops between the fifth and sixth cysteines, which contain several hydrophobic residues involved in the stabilizing interdomain interface. The relatively short linker of five residues between the sixth cysteine of EGF9 and the first cysteine of EGF10 means that highly folded, U-shaped conformations are unlikely due to steric clashes.

#### **Implications of the EGF10-EGF13 Model for Ligand Interactions**

The recent X-ray structure of Notch EGF11-13 in an antiparallel complex with Dll-4 shows interactions between EGF12 of Notch and the C2 domain of Dll-4 and between EGF11 of Notch and the DSL domain of Dll-4 (Luca et al., 2015). Our model for human Notch1 EGF10-13 can be used to provide further insights into Notch-ligand interactions. EGF10-13 has been superimposed

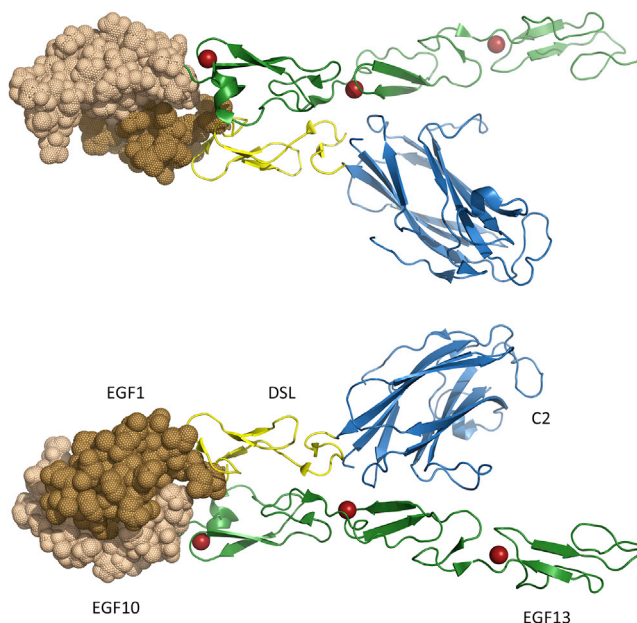

**Figure 5. Model of Potential Interaction between EGF10 of Notch and EGF1 of DII-4**

(Top) The model of EGF10-13 has been superimposed on EGF11-13 in the Notch-DII-4 complex (Luca et al., 2015). Notch domains EGF11-13 and the DII-4 C2 and DSL domains are shown as a cartoon representation. EGF10 of Notch (wheat) and EGF1 of DII-4 (light brown) are shown in a surface representation; this highlights the potential interaction between these two domains. The  $\text{Ca}^{2+}$ -binding EGF domains are shown in green, the DSL domain in yellow, and the C2 domain in blue. The  $\text{Ca}^{2+}$  ions bound in EGF11, EGF12, and EGF13 are shown as red spheres.

(Bottom) The model is rotated by  $180^\circ$  about the x axis.

onto Notch EGF11-13 in the structure of the complex solved by Luca et al. (2015) (Figure 5). This shows a potential interaction between Notch EGF10 and the EGF1 domain of DII-4. Although there are some steric clashes between the two domains, these could be alleviated by small reorientation of the two domains. It is interesting to note that the putative interface includes residues that are not conserved between DII and Jagged ligands, suggesting that this additional site could contribute to differences in binding.

#### Comparative Binding of EGF9-13, EGF10-13, and EGF11-13 to DII-4 and J1

The influence of the rigid interface between EGF10 and EGF11 on the binding to DII-4 was probed using an established flow cytometry assay (Figure 6A) (Cordle et al., 2008b; Taylor et al., 2014). Addition of EGF10 to EGF11-13 was found to decrease binding to cells expressing full-length human DII-4. Addition of EGF9, which has been shown in this study to have a flexible linkage to EGF10, had no further inhibitory effect on binding of EGF11-13 to DII-4. These data suggest that the N-terminal flanking domain EGF10 modulates the binding of EGF11-13 to DII-4 but that EGF9 does not. These experiments were repeated with Jagged1-expressing cells (Figure 6B). In contrast to DII-4, the addition of EGF10 to EGF11-13 did not decrease the binding, indicating that the modulatory effect of EGF10 is specific to DII-4.

## DISCUSSION

This study has examined the effect of non- $\text{Ca}^{2+}$ -binding EGF domains on the shape of the EGF4-13 region of Notch. The majority of EGF domains in this region bind  $\text{Ca}^{2+}$ , which confers the expected rigidity to the domain interface formed between the cbEGF domain and the preceding N-terminal EGF domain. Various solution NMR and X-ray structures have confirmed previously that high-affinity  $\text{Ca}^{2+}$  binding to the C-terminal EGF domain of a pair is predictive for a rod-like organization for tandem cbEGF domains and EGF-cbEGF pairs (Cordle et al., 2008a; Downing et al., 1996; Hambleton et al., 2004; Smallridge et al., 2003) and for heterologous cbEGF domain pairs (Jensen et al., 2005). In these structures,  $\text{Ca}^{2+}$  affinity is enhanced and a rigid structure is stabilized via interaction with a packing aromatic residue located between the fifth and sixth cysteine in the preceding domain (Figure S1).

The  $K_d$  values for  $\text{Ca}^{2+}$  binding to Notch EGF domains, measured by chromophoric chelation or by NMR spectroscopy, indicate moderate- to high-affinity sites ( $1\text{--}200\ \mu\text{M}$ ,  $l = 0.15$ , pH 7.5), which would be expected to be saturated under the physiological conditions of the extracellular milieu and insensitive to changes in  $\text{Ca}^{2+}$  flux at the cell membrane. However, the two non- $\text{Ca}^{2+}$ -binding EGF domains (EGF6 and EGF10) confer very different properties to the region. Both crystallography and NMR analysis demonstrate that the EGF5-6 interface is bent and rigid, introducing a tilt angle of  $\sim 70^\circ\text{--}90^\circ$ , while the EGF9-10 interface is flexible. Thus, unlike the cbEGF domain, the non- $\text{Ca}^{2+}$ -binding EGF, when in a C-terminal position, can confer very different properties to a domain interface, which are not obviously predictable from sequence.

Utilizing the new structural information from this study, together with published data for the EGF11-13 ligand-binding region (Cordle et al., 2008a), it is possible to construct a new model of the EGF4-13 region. The presence of a flexible linker between EGF9-10 separates the region into two rigid halves; EGF4-9, containing the bent interface between EGF5-6, and a near-linear section comprising EGF10-13 (Figure 4). It is interesting to note that two residues, A420 and N421, in Notch1, which we showed were present in a highly flexible loop between the first and second cysteine of Notch EGF11, are observed to pack against two residues R191 and F195 in the DSL domain that are highly conserved across the two Notch ligand families and are proposed by Luca et al. (2015) “to be a conserved focal point for ligand binding.”

The rigid interface formed between EGF10-11 provides new information with which to model the receptor-ligand complex. Superposition of the EGF10-13 region on the structure of the Notch/DII-4 complex shows that, instead of facing away from the ligand, EGF10 is in close proximity, suggesting a possible contact site between Notch EGF10 and DII-4 EGF1 (Figure 5). Previous studies have observed that EGF1 and 2 enhance binding of the J1 N terminus, comprising the C2 and DSL domains, to Notch. This could be an indirect effect of EGF1 on DSL structural integrity and/or additional specific contacts made between ligand and receptor at the EGF1/EGF10 interface (Shimizu et al., 1999).

The five-residue flexible linker between EGF9 and 10 is likely to preclude folding back (via a U-shaped structure at EGF9-10)



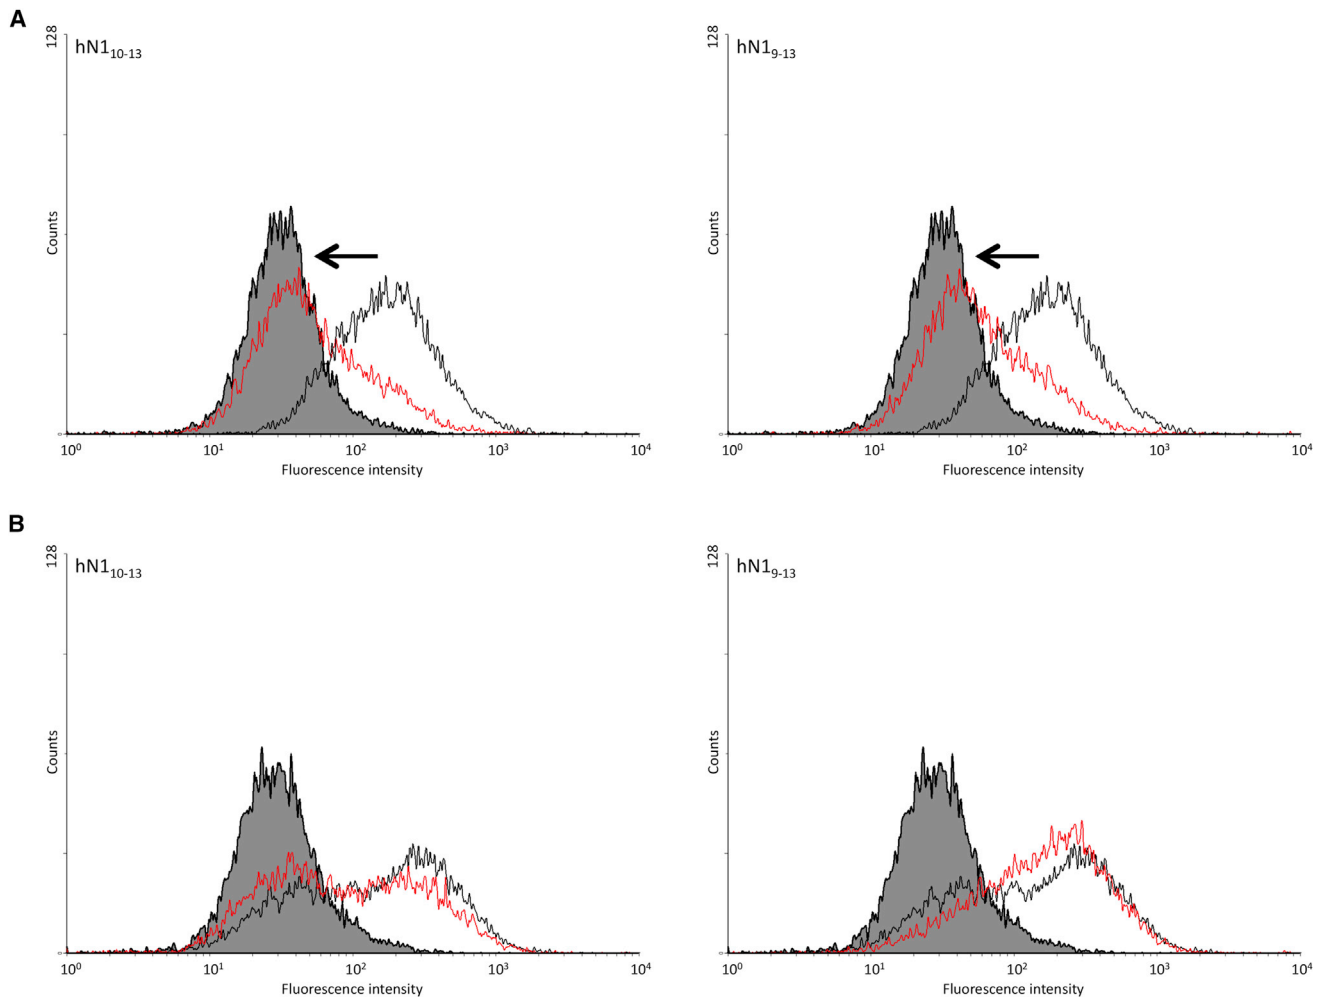

**Figure 6. Interaction of EGF11-13, EGF10-13, and EGF9-13 Constructs of Human Notch1 with DLL-4 and J1**

(A and B) Biotinylated hNotch1 EGF11-13 and (left) EGF10-13 or (right) EGF9-13 were bound to avidin-coated fluorescent beads and incubated with B16F10 cells expressing mDLL-4 (A) or mJ1 (B). The shift to the right away from the control protein (solid gray) shows binding of the EGF11-13 construct (black line) to mDLL-4 and mJ1. A reduction in binding, indicated by the black arrow, is seen for the EGF10-13 and EGF9-13 constructs (red line) to Dll-4 while no significant change is seen with mJ1.

of the EGF4-9 region such that it would impede the core recognition region of EGF11-12 by direct interactions. Instead, the near-linear section of EGF6-9, upstream of the flexible linkage at EGF9-10, suggests that Notch may align with ligand along its longitudinal axis, and overall a number of weak interactions along the length of the molecule may contribute to the overall binding affinity of receptor to ligand (Figure 7A). EGF8 of Notch, for example, could come into close proximity with EGF3 of the ligand. This could explain the influence of mutation of a conserved residue in EGF8 (V361M), which selectively affects *Drosophila* Serrate binding (Yamamoto et al., 2012). Furthermore, post-translational O-glycosylation modifications could further stabilize this interface. Because of the flexible linker between EGF9 and EGF10, it is not possible to identify specific interaction faces from our model.

Luca et al. (2015) have postulated that, as a consequence of the antiparallel orientation of the Notch/Dll-4 complex, there may be a single Notch/ligand complex that forms at the cell sur-

face in *cis* and in *trans*. This would necessitate a rotation, C-terminal of the core recognition region within each protein to maintain the binding interface. The identification of a flexible cbEGF/EGF linker in this study suggests that a homologous domain pair within each molecule could facilitate the necessary rotation.

Since we postulated that EGF10 was likely to make contacts with EGF1 of Dll-4 ligand, we compared the ligand binding of two fragments, EGF10-13 and EGF9-13, with that of the core recognition fragment EGF11-13. Utilizing a well-established flow cytometry assay, we demonstrated that the presence of EGF10 substantially reduced binding to Dll-4 (compared with that observed with EGF11-13). The addition of EGF9 did not further reduce binding. These data can be explained if addition of EGF10, which may have a steric clash with EGF1 of Dll-4, requires the readjustment of the positions of EGF10 and EGF1, which in turn affects the EGF11-DSL interaction site. It is notable that in the structure of the Notch/Dll-4 complex, where EGF11 is in a non-native context (not bound to

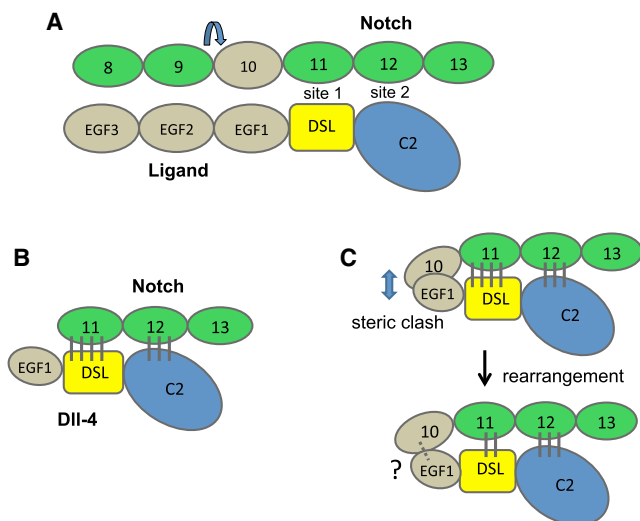

**Figure 7. Cartoon Representation of Possible Notch/Ligand Interactions and the Effect of Addition of EGF10 on the Interaction of EGF11-13 with Ligand**

(A) Notch EGF11/EGF12 and DII-4 DSL/C2 domains have been shown to interact at two sites (Luca et al., 2015). Our near-linear orientation for hN1 EGF6-9, upstream of the flexible linkage at EGF9-10 (indicated by the blue arrow above the linker), suggests that Notch may align with ligand along its longitudinal axis. The  $\text{Ca}^{2+}$ -binding EGF domains are shown in green, other EGF domains in wheat, the DSL domain in yellow, and the C2 domain in blue. The DII-1, DII-4, J1, and J2 ligands all share the C2-DSL-EGF1-3 architecture. DII-1 and DII-4 have a further five EGFs while J1 and J2 have a further 13 EGFs. (B) In the X-ray structure of the Notch/DII-4 complex, where EGF11 is in a non-native context (not bound to EGF10), EGF11 makes many more stabilizing contacts with DSL than EGF12 does with the C2 domain. The vertical lines in gray indicate stabilizing interactions between pairs of domains. (C) It is plausible that covalent linkage of EGF10 to EGF11-13 results in a steric clash between EGF10 and EGF1, and that small rearrangements that occur upon interaction with DII-4 could disrupt some EGF11-mediated contacts within the N-terminal region of this domain. New contacts made between EGF10 and EGF1 are not sufficient to overcome the loss of EGF11-mediated contacts, since Notch EGF10-13 binds less well to DII-4 than EGF11-13. The dashed gray line and the ? are used to indicate a possible interaction.

EGF10), EGF11 makes many more protein:protein contacts with DSL than EGF12 does with the C2 domain. It is therefore plausible that covalent linkage of EGF10 and small rearrangements that occur on interaction with DII-4 could disrupt some EGF11-mediated contacts within the N-terminal region of this domain (Figures 7B and 7C). If that is the case, then new contacts made between EGF10 and EGF1 are not sufficient to overcome the loss of EGF11-mediated contacts, since Notch EGF10-13 binds less well to DII-4 than EGF11-13. The lack of any further effect of EGF9 is consistent with the flexible nature of the EGF9-10 linker.

We previously observed a similar reduction in binding to DII-1 when comparing the binding of EGF10-14 with that of EGF11-14 and postulated a steric effect in the absence of structural data, which our current model confirms (Cordle et al., 2008b). Quantitative measurements by surface plasmon resonance showed a decreased affinity ( $K_d$  increases from 130  $\mu\text{M}$  to 200  $\mu\text{M}$ ), indicating that not all contacts between DSL of DII-1 and EGF11 are lost as a consequence of EGF10 addition. The importance of the EGF10-11 interface in modulating ligand binding was

further shown by the introduction of a  $\text{Ca}^{2+}$ -binding-site NG substitution in EGF11. This decouples the rigid interface between EGF10-11, which causes the steric clash with ligand, and restores binding. It is notable that the effect of EGF10 is ligand specific and observed only with the Delta family of ligands. This can be reconciled by the ligand-specific differences in amino acid sequences within the DSL domain, which are reflected in the substantially weaker binding of unmodified EGF11-13 to J1 compared with DII-4 (Taylor et al., 2014), and at the proposed interface involving EGF1.

Our model for the EGF4-13 region identifies the architecture of Notch in the absence of any post-translational modification such as O-glycosylation and gives new insight into the organization of Notch/ligand complexes. Previous publications of Taylor et al. (2014) and Luca et al. (2015) have demonstrated that O-glycosylation of residues within the ligand-binding region in EGF11 and EGF12 can contribute directly to the binding interface between ligand and receptor, and many studies have indicated that O-glycosylation at other sites along Notch can influence signaling activity. Our unmodified EGF domain studies demonstrate that, in the absence of O-glycans in EGF11 and EGF12, we observe an inhibitory effect of EGF10 on DII-4 and DII-1 binding, but not on J1. It is therefore interesting to postulate that O-glycosyltransferase-mediated addition of O-glycans within EGF11, in addition to Fringe-mediated additions to EGF12, could be an additional mode of regulation used to modulate Notch signaling, particularly by the Delta family of ligands.

In summary, our unmodified EGF domain studies have provided new information about the shape of the Notch extracellular domain and the importance of determining the individual properties of common domain interfaces. They provide a platform to understand the basal architecture of the extracellular region of Notch, which may be further modified by O-glycosylation to fine-tune interactions with a repertoire of ligands.

## EXPERIMENTAL PROCEDURES

### Protein Expression, Purification, Refolding, and Characterization

Protein expression, isotopic labeling, refolding, and purification protocols have been described previously (Muranyi et al., 2004; Weisshuhn et al., 2015a, 2015b; Whiteman et al., 2014). Protein fragments were expressed in *Escherichia coli* BL21 cells transformed with a pQE30 (Qiagen)-based protein expression construct and a pREP4 plasmid for control of expression via the Lac Repressor. All expression vectors contained an N-terminal His6 tag for purification and either a factor Xa (EGF4-7, EGF5-7, EGF10-13, EGF11-13) or an enterokinase (EGF8-11) recognition site for later removal of the His6 tag. The tag was not cleaved for EGF7-9 and EGF9-11; the His6 tag shows no evidence of  $\text{Ca}^{2+}$  binding. The final protein products were analyzed by SDS-PAGE (Figure S4).

### NMR Spectroscopy

All NMR experiments were carried out using spectrometers operating at  $^1\text{H}$  frequencies ranging from 500 to 950 MHz. The spectrometers are equipped with Oxford Instruments magnets and home-built triple-resonance pulsed-field gradient probes. Data were processed using NMRPipe (Delaglio et al., 1995) and spectra were analyzed using the CCPN software (Vranken et al., 2005).

Resonance assignments for EGF4-7, EGF8-11, and EGF11-13 have been described previously (Muranyi et al., 2004; Weisshuhn et al., 2015a, 2015b) (Biological Magnetic Resonance Bank accession numbers 25172, 25533, 6031). 3D  $^{15}\text{N}$ -edited total correlation spectroscopy-heteronuclear single quantum coherence (HSQC) and NOE spectroscopy (NOESY)-HSQC spectra were collected to assign the  $^1\text{H}$ - $^{15}\text{N}$  HSQC spectrum of EGF7-9.

Unless otherwise stated, all NMR experiments were carried out at 25°C in 5 mM Tris-HCl at pH 7.5 in 95% H<sub>2</sub>O/5% D<sub>2</sub>O. Protein samples for measurement of the <sup>1</sup>H-<sup>15</sup>N heteronuclear NOE or <sup>1</sup>H-<sup>15</sup>N RDCs contained at least 25 mM CaCl<sub>2</sub> to ensure all Ca<sup>2+</sup>-binding sites were saturated. Further information about the NOE experiments and the collection and analysis of RDC data can be found in [Supplemental Experimental Procedures](#).

### Measurement of Ca<sup>2+</sup> Dissociation Constants

For Ca<sup>2+</sup> titrations monitored by NMR, protein samples were prepared in 5 mM Tris-HCl buffer (pH 7.5) made with 99.9% D<sub>2</sub>O containing 150 mM NaCl (to maintain approximate physiological ionic strength  $I = \sim 0.15$ ); samples were initially Ca<sup>2+</sup> free and the Ca<sup>2+</sup> concentration was increased by addition of CaCl<sub>2</sub> aliquots up to saturating concentrations (usually >25 mM). Ca<sup>2+</sup> binding was monitored using 2D <sup>1</sup>H-<sup>1</sup>H NOESY spectra collected with a mixing time of 150 ms ([Jensen et al., 2005](#); [Smallridge et al., 1999](#); [Suk et al., 2004](#)).

Ca<sup>2+</sup> dissociation constants for high-affinity sites were determined by competition with the chromophoric chelator 5,5'-Br<sub>2</sub>BAPTA ([Jensen et al., 2005](#); [Linse et al., 1991](#); [Suk et al., 2004](#)). Solutions of proteins in Ca<sup>2+</sup>-free buffer (5 mM Tris [pH 7.5], 150 mM NaCl) were titrated with Ca<sup>2+</sup>-stock buffer (5 mM Tris [pH 7.5], 1 mM CaCl<sub>2</sub>, 150 mM NaCl) in the presence of 5,5'-Br<sub>2</sub>BAPTA ( $K_d$  of 1.6 μM under these conditions). All titrations were performed with 20–30 μM chelator and 20–30 μM protein at room temperature (approx. 23°C) using a Shimadzu UV mini 1240 spectrophotometer. Dissociation constants were calculated by least-squares fitting to the data using in-house software ([Linse et al., 1991](#); [Stenberg et al., 1997](#)). Each titration was repeated at least three times. Experimental data were fitted to models with one or two high-affinity Ca<sup>2+</sup> binding sites, and the most suitable model was chosen using an F test. This method is suitable for defining Ca<sup>2+</sup>  $K_d$  values in the range of ~1–20 μM.

### X-Ray Crystallography

Human Notch1 EGF4–7 was crystallized by vapor diffusion from sitting drops with 25% mother liquor and protein at 14 mg/ml in 50 mM Tris (pH 7.4), 1 mM CaCl<sub>2</sub>. Commercially available mother liquor from Molecular Dimensions was used. The P<sub>21</sub> form crystallized in 0.1 M sodium cacodylate (pH 6.5) with 18% w/v PEG 2000 MME. The C<sub>2</sub> form crystallized in 0.2 M imidazole malate (pH 8.5) with 7.5% w/v PEG 10,000. The Diamond facility was used for data collection (beamline I03). Both datasets were indexed and scaled using Xia2 ([Winter, 2010](#)). The structure was phased using molecular replacement of canonical EGF domains in Phaser ([McCoy et al., 2007](#)). Structures were refined using the program Autobuster with the graphics program COOT used for manual rebuilding and inspection ([Bricogne et al. 2011](#); [Emsley and Cowtan, 2004](#)). MolProbity was used to determine structural quality ([Chen et al., 2010](#)).

### Flow Cytometry Binding Assay

Flow cytometry was carried out as described previously ([Whiteman et al., 2013](#)). Briefly, biotinylated human Notch1 EGF11–13, EGF10–13, and EGF9–13 were coupled to avidin-coated purple fluorescent beads (Spherotech) and added to B16F10 cells expressing mDII-4 or mJagged1. Following incubation, samples were analyzed directly by flow cytometry without removal of unbound beads.

### ACCESSION NUMBERS

The accession numbers for the coordinates of EGF4–7 in the P<sub>21</sub> and C<sub>2</sub> crystal forms reported in this paper are PDB: 5FMA and 5FM9.

### SUPPLEMENTAL INFORMATION

Supplemental Information includes Supplemental Experimental Procedures, four figures, and two tables and can be found with this article online at <http://dx.doi.org/10.1016/j.str.2016.02.010>.

### AUTHOR CONTRIBUTIONS

P.C.W. collected and analyzed calcium binding and NMR data. P.T. and P.W. collected and analyzed flow cytometry data. D.S. collected and refined X-ray

data. S.M.L. conceived and supervised the X-ray studies. P.A.H. and C.R. conceived and supervised all other aspects of the research and wrote the manuscript. All authors discussed the results and implications and commented on the manuscript at all stages.

### ACKNOWLEDGMENTS

P.C.W. was supported by a Cancer Research UK studentship awarded to P.A.H. and C.R.. D.S. was supported by a Wellcome Trust Grant (3097928) awarded to P.A.H. and S.M.L.. P.T. was supported by a Biotechnology and Biological Sciences Research Council studentship. S.M.L. is supported by a Wellcome Senior Investigator Award 100298. C.R. was supported in part by a Wellcome Trust Grant (079440). We thank Professor Adrian Harris, University of Oxford, for the kind gift of DII-4 and J1-expressing B16 cells. We thank Jemima Cordle and Nattnee Viticheep for preliminary measurements of Ca<sup>2+</sup> affinities for EGF11–13. We thank Diamond Light Source for access to beamline I03 (under proposal MX12346) that contributed to the results presented here.

Received: November 17, 2015

Revised: February 9, 2016

Accepted: February 17, 2016

Published: March 17, 2016

### REFERENCES

- Acar, M., Jafar-Nejad, H., Takeuchi, H., Rajan, A., Ibrani, D., Rana, N.A., Pan, H., Haltiwanger, R.S., and Bellen, H.J. (2008). Rumi is a CAP10 domain glycosyltransferase that modifies notch and is required for notch signaling. *Cell* **132**, 247–258.
- Artavanis-Tsakonas, S., Rand, M.D., and Lake, R.J. (1999). Notch signaling: cell fate control and signal integration in development. *Science* **284**, 770–776.
- Blaumueller, C.M., Qi, H.L., Zagouras, P., and Artavanis-Tsakonas, S. (1997). Intracellular cleavage of notch leads to a heterodimeric receptor on the plasma membrane. *Cell* **90**, 281–291.
- Braddock, D.T., Cai, M.L., Baber, J.L., Huang, Y., and Clore, G.M. (2001). Rapid identification of medium- to large-scale interdomain motion in modular proteins using dipolar couplings. *J. Am. Chem. Soc.* **123**, 8634–8635.
- Bray, S.J. (2006). Notch signalling: a simple pathway becomes complex. *Nat. Rev. Mol. Cell Biol.* **7**, 678–689.
- Breitwieser, G.E. (2008). Extracellular calcium as an integrator of tissue function. *Int. J. Biochem. Cell Biol.* **40**, 1467–1480.
- Bricogne, G., Blanc, E., Brandl, M., Flensburg, C., Keller, P., Paciorek, W., Roversi, P., Sharff, A., Smart, O.S., Vornrhein, C., et al. (2011). BUSTER version X.Y.Z (Global Phasing Ltd).
- Chen, K., and Tjandra, N. (2012). NMR of proteins and small biomolecules. In *Topics in Current Chemistry*, vol. 326, G. Zhu, ed. (Springer-Verlag), pp. 47–67.
- Chen, V.B., Arendall, W.B., Headd, J.J., Keedy, D.A., Immormino, R.M., Kapral, G.J., Murray, L.W., Richardson, J.S., and Richardson, D.C. (2010). MolProbity: all-atom structure validation for macromolecular crystallography. *Acta Crystallogr. D Biol. Crystallogr.* **66**, 12–21.
- Cordle, J., Johnson, S., Tay, J.Z.Y., Roversi, P., Wilkin, M.B., de Madrid, B.H., Shimizu, H., Jensen, S., Whiteman, P., Jin, B., et al. (2008a). A conserved face of the Jagged/Serrate DSL domain is involved in Notch trans-activation and cis-inhibition. *Nat. Struct. Mol. Biol.* **15**, 849–857.
- Cordle, J., Redfield, C., Stacey, M., van der Merwe, P.A., Willis, A.C., Champion, B.R., Hambleton, S., and Handford, P.A. (2008b). Localization of the delta-like-1-binding site in human notch-1 and its modulation by calcium affinity. *J. Biol. Chem.* **283**, 11785–11793.
- deCelis, J.F., and Bray, S. (1997). Feed-back mechanisms affecting Notch activation at the dorsoventral boundary in the *Drosophila* wing. *Development* **124**, 3241–3251.
- Delaglio, F., Grzesiek, S., Vuister, G.W., Zhu, G., Pfeifer, J., and Bax, A. (1995). Nmrpipe - a multidimensional spectral processing system based on unix pipes. *J. Biomol. NMR* **6**, 277–293.

- Downing, A.K., Knott, V., Werner, J.M., Cardy, C.M., Campbell, I.D., and Handford, P.A. (1996). Solution structure of a pair of calcium-binding epidermal growth factor-like domains: implications for the Marfan syndrome and other genetic disorders. *Cell* 85, 597–605.
- Emsley, P., and Cowtan, K. (2004). Coot: model-building tools for molecular graphics. *Acta Crystallogr. D Biol. Crystallogr.* 60, 2126–2132.
- Fischer, M.W.F., Losonczi, J.A., Weaver, J.L., and Prestegard, J.H. (1999). Domain orientation and dynamics in multidomain proteins from residual dipolar couplings. *Biochemistry* 38, 9013–9022.
- Franklin, J.L., Berechid, B.E., Cutting, F.B., Presente, A., Chambers, C.B., Foltz, D.R., Ferreira, A., and Nye, J.S. (1999). Autonomous and non-autonomous regulation of mammalian neurite development by Notch1 and Delta1. *Curr. Biol.* 9, 1448–1457.
- Gordon, W.R., Vardar-Ulu, D., Histen, G., Sanchez-Irizarry, C., Aster, J.C., and Blacklow, S.C. (2007). Structural basis for autoinhibition of Notch. *Nat. Struct. Mol. Biol.* 14, 295–300.
- Hambleton, S., Valev, N.V., Muranyi, A., Knott, V., Werner, J.M., McMichael, A.J., Handford, P.A., and Downing, A.K. (2004). Structural and functional properties of the human Notch-1 ligand binding region. *Structure* 12, 2173–2183.
- Handford, P.A., Mayhew, M., Baron, M., Winship, P.R., Campbell, I.D., and Brownlee, G.G. (1991). Key residues involved in calcium-binding motifs in Egf-like domains. *Nature* 351, 164–167.
- Jarriault, S., Brou, C., Logeat, F., Schroeter, E.H., Kopan, R., and Israel, A. (1995). Signaling downstream of activated mammalian Notch. *Nature* 377, 355–358.
- Jensen, S.A., Corbett, A.R., Knott, V., Redfield, C., and Handford, P.A. (2005). Ca<sup>2+</sup>-dependent interface formation in fibrillin-1. *J. Biol. Chem.* 280, 14076–14084.
- Johnston, S.H., Rauskolb, C., Wilson, R., Prabhakaran, B., Irvine, K.D., and Vogt, T.F. (1997). A family of mammalian Fringe genes implicated in boundary determination and the Notch pathway. *Development* 124, 2245–2254.
- Kelly, D.F., Lake, R.J., Middelkoop, T.C., Fan, H.Y., Artavanis-Tsakonas, S., and Walz, T. (2010). Molecular structure and dimeric organization of the Notch extracellular domain as revealed by electron microscopy. *PLoS One* 5, e10532.
- Linse, S., Helmersson, A., and Forsen, S. (1991). Calcium-binding to calmodulin and its globular domains. *J. Biol. Chem.* 266, 8050–8054.
- Logeat, F., Bessia, C., Brou, C., LeBail, O., Jarriault, S., Seidah, N.G., and Israel, A. (1998). The Notch1 receptor is cleaved constitutively by a furin-like convertase. *Proc. Natl. Acad. Sci. USA* 95, 8108–8112.
- Louvi, A., and Artavanis-Tsakonas, S. (2012). Notch and disease: a growing field. *Semin. Cell Dev. Biol.* 23, 473–480.
- Luca, V.C., Jude, K.M., Pierce, N.W., Nachury, M.V., Fischer, S., and Garcia, K.C. (2015). Structural basis for Notch1 engagement of Delta-like 4. *Science* 347, 847–853.
- Mayhew, M., Handford, P., Baron, M., Tse, A.G.D., Campbell, I.D., and Brownlee, G.G. (1992). Ligand requirements for Ca<sup>2+</sup> binding to Egf-like domains. *Protein Eng.* 5, 489–494.
- Mccoy, A.J., Grosse-Kunstleve, R.W., Adams, P.D., Winn, M.D., Storoni, L.C., and Read, R.J. (2007). Phaser crystallographic software. *J. Appl. Crystallogr.* 40, 658–674.
- Moloney, D.J., Panin, V.M., Johnston, S.H., Chen, J.H., Shao, L., Wilson, R., Wang, Y., Stanley, P., Irvine, K.D., Haltiwanger, R.S., et al. (2000a). Fringe is a glycosyltransferase that modifies Notch. *Nature* 406, 369–375.
- Moloney, D.J., Shair, L.H., Lu, F.M., Xia, J., Locke, R., Matta, K.L., and Haltiwanger, R.S. (2000b). Mammalian Notch1 is modified with two unusual forms of O-linked glycosylation found on epidermal growth factor-like modules. *J. Biol. Chem.* 275, 9604–9611.
- Morgan, W.D., Birdsall, B., Frenkiel, T.A., Gradwell, M.G., Burghaus, P.A., Syed, S.E.H., Uthapibull, C., Holder, A.A., and Feeney, J. (1999). Solution structure of an EGF module pair from the Plasmodium falciparum merozoite surface protein 1. *J. Mol. Biol.* 289, 113–122.
- Mumm, J.S., and Kopan, R. (2000). Notch signaling: from the outside in. *Dev. Biol.* 228, 151–165.
- Muranyi, A., Hambleton, S., Knott, V., McMichael, A., Handford, P.A., and Downing, A.K. (2004). Letter to the Editor: H-1, C-13, and N-15 resonance assignments of human Notch-1 calcium binding EGF domains 11–13. *J. Biomol. NMR* 29, 443–444.
- Nam, Y., Sliz, P., Song, L.Y., Aster, J.C., and Blacklow, S.C. (2006). Structural basis for cooperativity in recruitment of MAML coactivators to Notch transcription complexes. *Cell* 124, 973–983.
- Ntziachristos, P., Lim, J.S., Sage, J., and Aifantis, I. (2014). From fly wings to targeted cancer therapies: a centennial for Notch signaling. *Cancer Cell* 25, 318–334.
- Palmer, A.G. (2004). NMR characterization of the dynamics of biomacromolecules. *Chem. Rev.* 104, 3623–3640.
- Prestegard, J.H., Bougault, C.M., and Kishore, A.I. (2004). Residual dipolar couplings in structure determination of biomolecules. *Chem. Rev.* 104, 3519–3540.
- Rana, N.A., and Haltiwanger, R.S. (2011). Fringe benefits: functional and structural impacts of O-glycosylation on the extracellular domain of Notch receptors. *Curr. Opin. Struct. Biol.* 21, 583–589.
- Rand, M.D., Grimm, L.M., Artavanis-Tsakonas, S., Patriub, V., Blacklow, S.C., Sklar, J., and Aster, J.C. (2000). Calcium depletion dissociates and activates heterodimeric notch receptors. *Mol. Cell Biol.* 20, 1825–1835.
- Rees, D.J.G., Jones, I.M., Handford, P.A., Walter, S.J., Esnouf, M.P., Smith, K.J., and Brownlee, G.G. (1988). The role of beta-hydroxyaspartate and adjacent carboxylate residues in the 1st Egf domain of human factor-IX. *EMBO J.* 7, 2053–2061.
- Ruckert, M., and Otting, G. (2000). Alignment of biological macromolecules in novel nonionic liquid crystalline media for NMR experiments. *J. Am. Chem. Soc.* 122, 7793–7797.
- Sanchez-Irizarry, C., Carpenter, A.C., Weng, A.P., Pear, W.S., Aster, J.C., and Blacklow, S.C. (2004). Notch subunit heterodimerization and prevention of ligand-independent proteolytic activation depend, respectively, on a novel domain and the LNR repeats. *Mol. Cell Biol.* 24, 9265–9273.
- Schroeter, E.H., Kisslinger, J.A., and Kopan, R. (1998). Notch-1 signalling requires ligand-induced proteolytic release of intracellular domain. *Nature* 393, 382–386.
- Shao, L., Moloney, D.J., and Haltiwanger, R. (2003). Fringe modifies O-fucose on mouse Notch1 at epidermal growth factor-like repeats within the ligand-binding site and the abruptex region. *J. Biol. Chem.* 278, 7775–7782.
- Shen, Y., Delaglio, F., Cornilescu, G., and Bax, A. (2009). TALOS plus: a hybrid method for predicting protein backbone torsion angles from NMR chemical shifts. *J. Biomol. NMR* 44, 213–223.
- Shimizu, K., Chiba, S., Kumano, K., Hosoya, N., Takahashi, T., Kanda, Y., Hamada, Y., Yazaki, Y., and Hirai, H. (1999). Mouse Jagged1 physically interacts with Notch2 and other Notch receptors - assessment by quantitative methods. *J. Biol. Chem.* 274, 32961–32969.
- Smallridge, R.S., Whiteman, P., Doering, K., Handford, P.A., and Downing, A.K. (1999). EGF-like domain calcium affinity modulated by N-terminal domain linkage in human fibrillin-1. *J. Mol. Biol.* 286, 661–668.
- Smallridge, R.S., Whiteman, P., Werner, J.M., Campbell, I.D., Handford, P.A., and Downing, A.K. (2003). Solution structure and dynamics of a calcium binding epidermal growth factor-like domain pair from the neonatal region of human fibrillin-1. *J. Biol. Chem.* 278, 12199–12206.
- Stenberg, Y., Linse, S., Drakenberg, T., and Stenflo, J. (1997). The high affinity calcium-binding sites in the epidermal growth factor module region of vitamin K-dependent protein S. *J. Biol. Chem.* 272, 23255–23260.
- Suk, J.Y., Jensen, S., McGettrick, A., Willis, A.C., Whiteman, P., Redfield, C., and Handford, P.A. (2004). Structural consequences of cysteine substitutions C1977Y and C1977R in calcium-binding epidermal growth factor-like domain 30 of human fibrillin-1. *J. Biol. Chem.* 279, 51258–51265.

- Taylor, P., Takeuchi, H., Sheppard, D., Chillakuri, C., Lea, S.M., Haltiwanger, R.S., and Handford, P.A. (2014). Fringe-mediated extension of O-linked fucose in the ligand-binding region of Notch1 increases binding to mammalian Notch ligands. *Proc. Natl. Acad. Sci. USA* *111*, 7290–7295.
- Tolman, J.R., and Ruan, K. (2006). NMR residual dipolar couplings as probes of biomolecular dynamics. *Chem. Rev.* *106*, 1720–1736.
- Vranken, W.F., Boucher, W., Stevens, T.J., Fogh, R.H., Pajon, A., Llinas, P., Ulrich, E.L., Markley, J.L., Ionides, J., and Laue, E.D. (2005). The CCPN data model for NMR spectroscopy: development of a software pipeline. *Proteins* *59*, 687–696.
- Weisshuhn, P.C., Handford, P.A., and Redfield, C. (2015a). H-1, C-13 and N-15 assignments of EGF domains 4 to 7 of human Notch-1. *Biomol. NMR Assign* *9*, 275–279.
- Weisshuhn, P.C., Handford, P.A., and Redfield, C. (2015b). H-1, C-13 and N-15 assignments of EGF domains 8-11 of human Notch-1. *Biomol. NMR Assign* *9*, 375–379.
- Whiteman, P., de Madrid, B.H., Taylor, P., Li, D.M., Heslop, R., Viticheep, N., Tan, J.Z., Shimizu, H., Callaghan, J., Masiero, M., et al. (2013). Molecular basis for Jagged-1/Serrate ligand recognition by the notch receptor. *J. Biol. Chem.* *288*, 7305–7312.
- Whiteman, P., Redfield, C., and Handford, P.A. (2014). Bacterial expression and in vitro refolding of limited fragments of the Notch receptor and its ligands. *Methods Mol. Biol.* *1187*, 193–208.
- Wilson, J.J., and Kovall, R.A. (2006). Crystal structure of the CSL-Notch-Mastermind ternary complex bound to DNA. *Cell* *124*, 985–996.
- Winter, G. (2010). xia2: an expert system for macromolecular crystallography data reduction. *J. Appl. Crystallogr.* *43*, 186–190.
- Xu, A.G., Lei, L., and Irvine, K.D. (2005). Regions of *Drosophila* Notch that contribute to ligand binding and the modulatory influence of fringe. *J. Biol. Chem.* *280*, 30158–30165.
- Yamamoto, S., Chang, W.L., Rana, N.A., Kakuda, S., Jaiswal, M., Bayat, V., Xiong, B., Zhang, K., Sandoval, H., David, G., et al. (2012). A mutation in EGF repeat-8 of Notch discriminates between Serrate/Jagged and delta family ligands. *Science* *338*, 1229–1232.

**Structure, Volume 24**

**Supplemental Information**

**Non-Linear and Flexible Regions of the Human**

**Notch1 Extracellular Domain Revealed**

**by High-Resolution Structural Studies**

**Philip C. Weissuhn, Devon Sheppard, Paul Taylor, Pat Whiteman, Susan M. Lea, Penny A. Handford, and Christina Redfield**

(A)

|         |         |      |           |         |              |       |            |      |
|---------|---------|------|-----------|---------|--------------|-------|------------|------|
| hN-1 4  | -       | ADP  | C ASNP    | C ANGGQ | C LPFEASYI   | C H C | C PPSFHGPT | C RQ |
| hN-1 5  | calcium | DVNE | C GQK PGL | C RHGGT | C HNEVGSYR   | C V C | C RATHTGPN | C ER |
| hN-1 6  | -       | PYPV | C SPSP    | C QNGGT | C RPTGDVTHE  | C A C | C LFGFTGQN | C EE |
| hN-1 7  | calcium | NIDD | C PGNN    | C KNNGA | C VDGVNTYN   | C R C | C PPEWTGQY | C TE |
| hN-1 8  | calcium | DVDE | C QLM PNA | C QNGGT | C HNTHGGYN   | C V C | C VNGWTGED | C SE |
| hN-1 9  | calcium | NIDD | C ASAA    | C FHGAT | C HDRVASFY   | C E C | C PHGRTGLL | C HL |
| hN-1 10 | -       | NDA  | C ISNP    | C NEGSN | C DTNPVNGKAI | C T C | C PSGYTGPA | C SQ |
| hN-1 11 | calcium | DVDE | C SLGANP  | C EHAGK | C INTLGSFE   | C Q C | C LQGYTGPR | C EI |
| hN-1 12 | calcium | DVNE | C VSNP    | C QNDAT | C LDQIGEFQ   | C I C | C MPGYEGVH | C EV |
| hN-1 13 | calcium | NTDE | C ASSP    | C LHNGR | C LDKINEFQ   | C E C | C PTGFTGHL | C QY |

↓↓↓     ↓     ↓     ↓     ↓

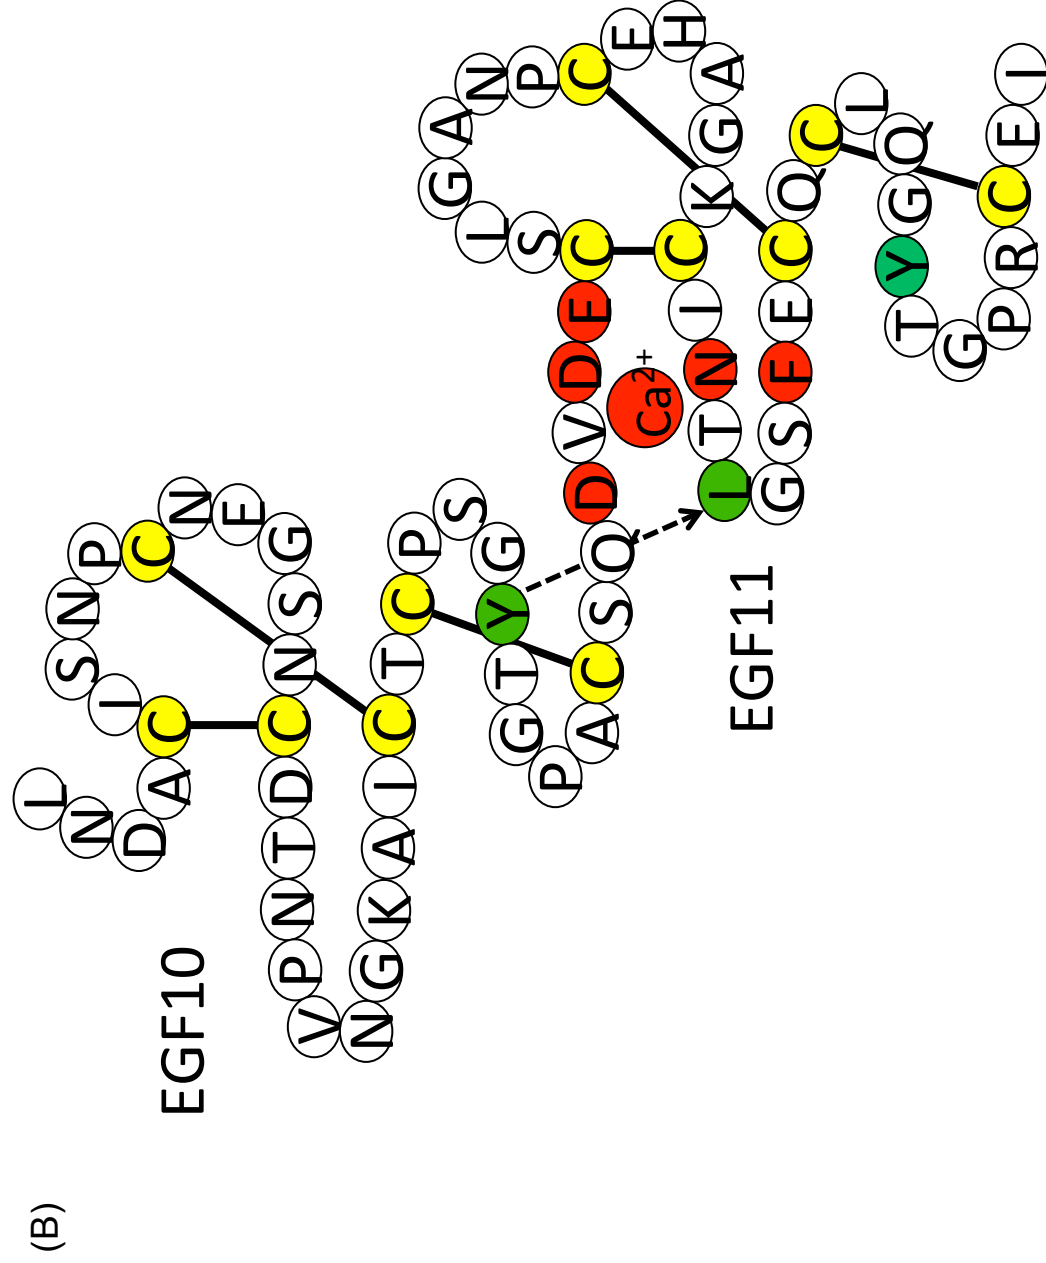

Figure S1

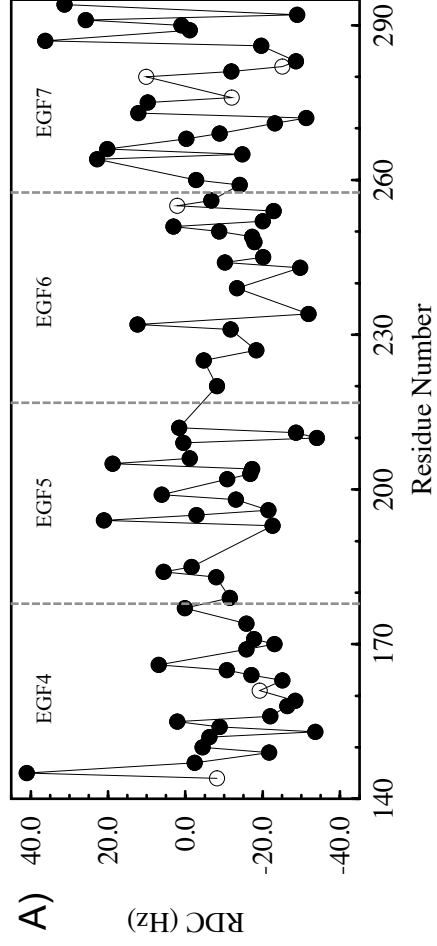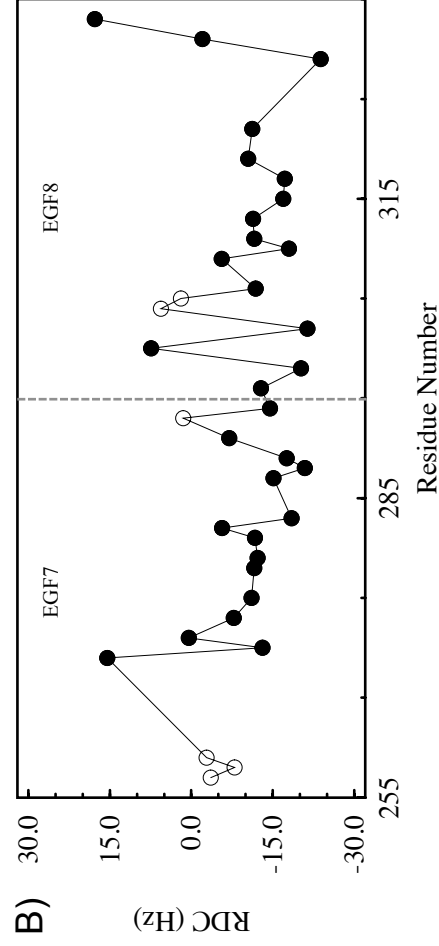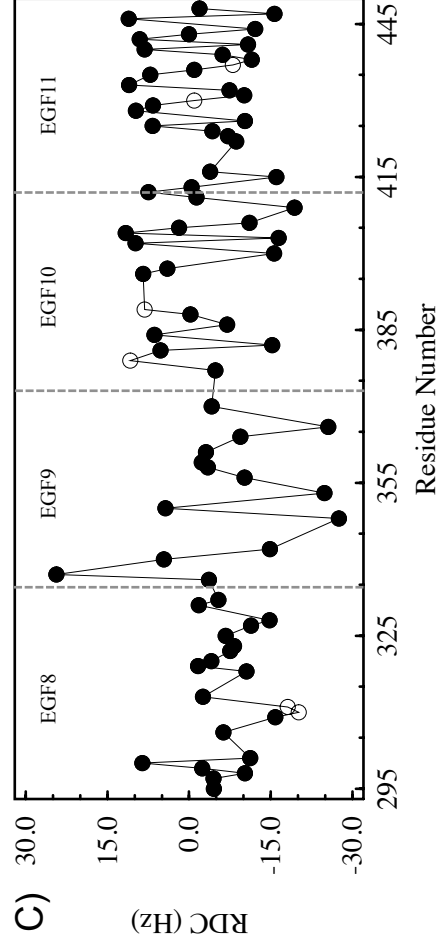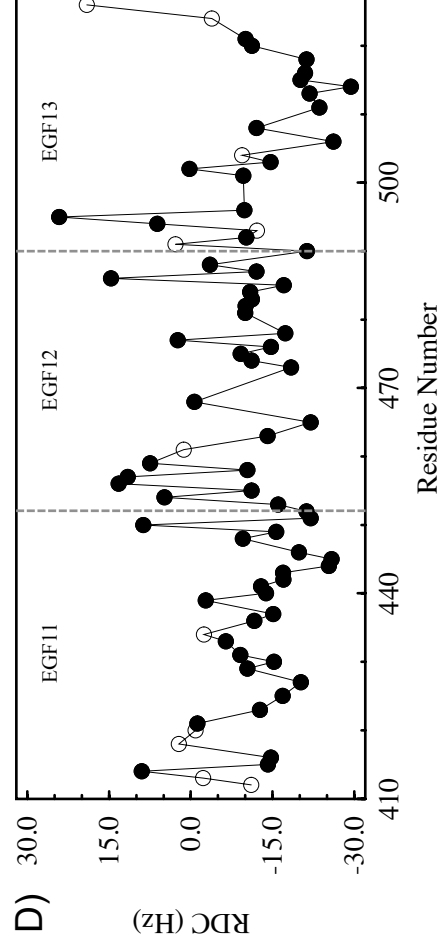

Figure S2



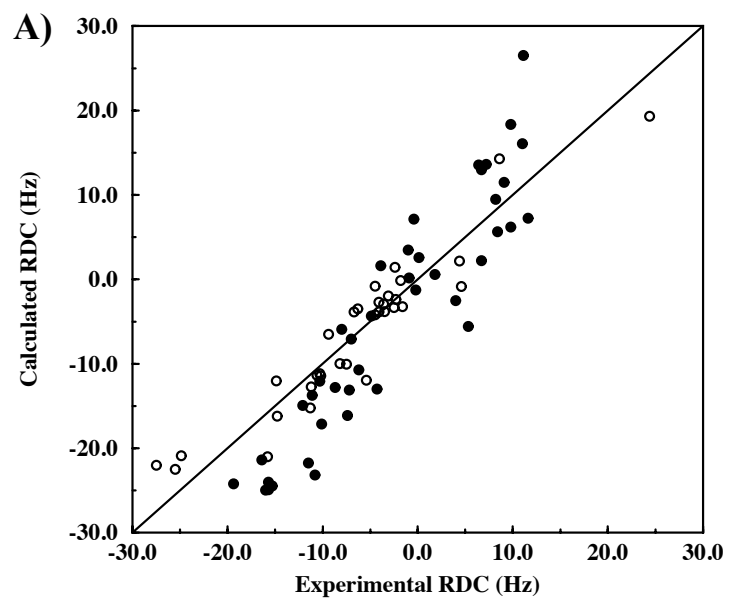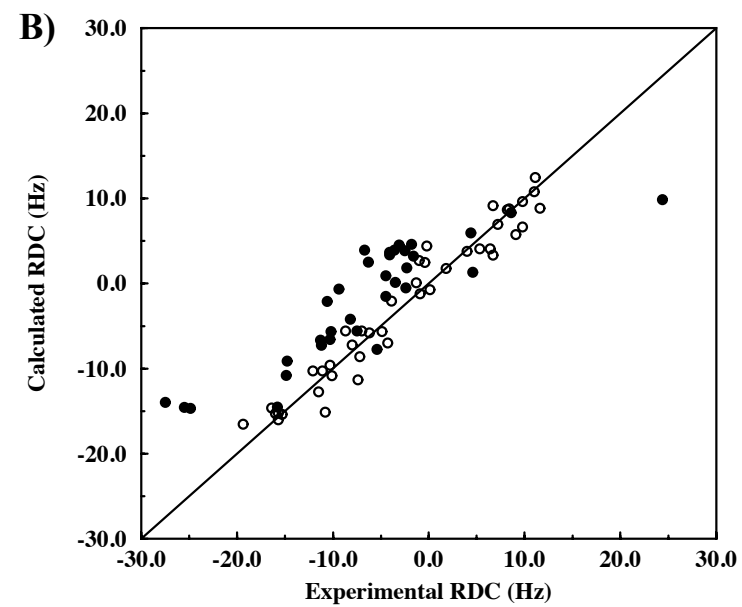

Figure S3

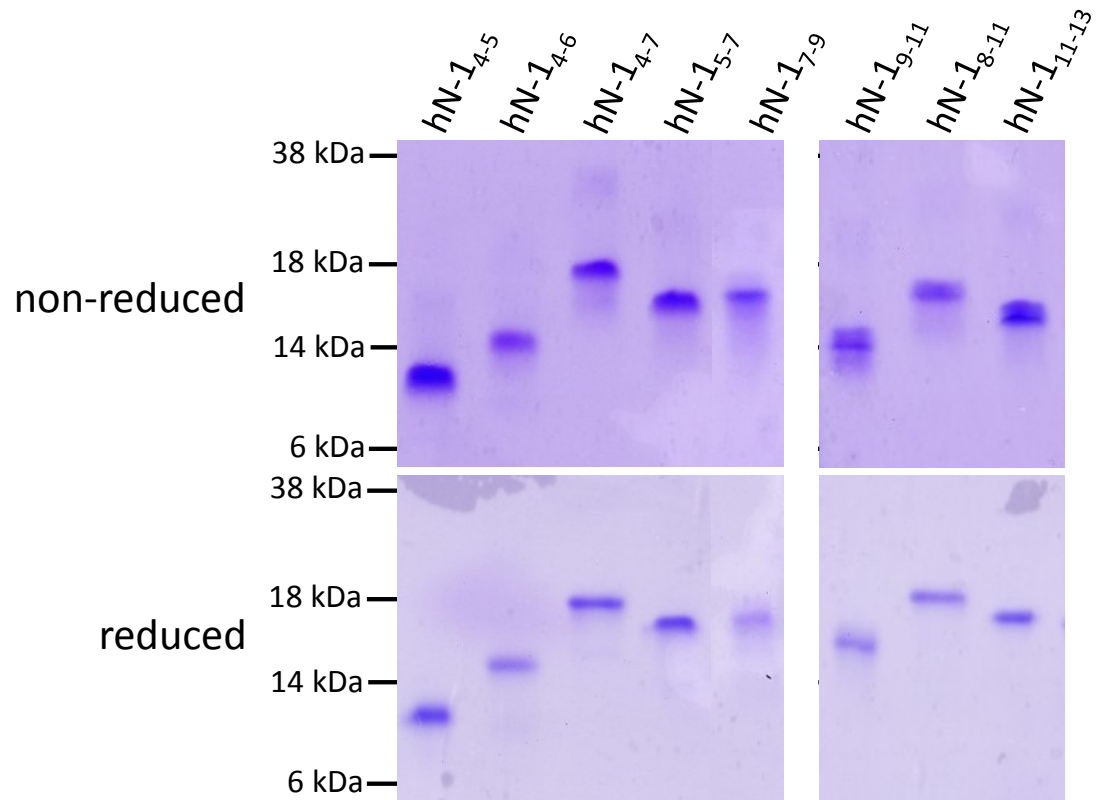

Figure S4

## Supplemental Figure Legends

### Figure S1. Related to Figure 1. Sequence alignment of EGF domains 4-13 in hN-1 showing consensus calcium-binding residues and schematic representation of an EGF/calcium-binding EGF pair

(A) Alignment was performed on conserved cysteines (yellow). Most EGF domains are  $\text{Ca}^{2+}$  binding. The 5 solid red arrows indicate the positions of the conserved residues of the D/N-x-D/N-E/Q-x<sub>m</sub>-D/N\*-x<sub>n</sub>-Y/F calcium-binding motif. The green arrows indicate the position of the conserved hydrophobic residue in the  $\beta$ -hairpin and the aromatic residue involved in a packing interaction with the following domain.

(B) Schematic representation of the EGF10-EGF11 pair. Each EGF domain contains six highly-conserved cysteine residues (shown in yellow) paired in a 1-3, 2-4, 5-6 arrangement to stabilize domain structure. There are typically 6 residues between the 6<sup>th</sup> cysteine of an EGF domain and the 1<sup>st</sup> cysteine of the following domain. In EGF11, the residues of the consensus calcium-binding sequence, D/N-x-D/N-E/Q-x<sub>m</sub>-D/N\*-x<sub>n</sub>-Y/F (where \* indicates possible  $\beta$ -hydroxylation and m/n are variable), and the calcium ion are indicated in red. The residues normally involved in interdomain packing, the aromatic residue four positions after the 5<sup>th</sup> cysteine in the N-terminal domain and the hydrophobic residue in the  $\beta$ -hairpin of the C-terminal domain, are indicated in green. In EGF10/EGF11 this interaction involves Y404 and L433 and is indicated with an arrow. Y444 is involved in an interdomain packing interaction with EGF12.

### Figure S2. Related to Figure 2 and Table 2. Residual dipolar coupling (RDC) data for EGF4-7, EGF7-8, EGF8-11 and EGF11-13

(A) RDCs measured for a total of 83 residues in EGF4-7 in 2.5% C12E6/n-hexanol are plotted as a function of sequence. Even in this low concentration of the alignment medium, large RDC values ranging from -40 to +40 Hz were observed.

(B) The EGF7-9 construct showed broadened peaks for EGF9 but sharp peaks for EGF7 and EGF8. RDCs measured for a total of 37 residues in EGF7-8 in 2.5% C12E6/n-hexanol are plotted as a function of sequence.

(C) RDCs measured for a total of 81 residues in EGF8-11 in 2.7% C12E6/n-hexanol are plotted as a function of sequence.

(D) RDCs measured for a total of 79 residues in EGF11-13 in 2% C12E6/n-hexanol are plotted as a function of sequence. Even in this low concentration of the alignment medium, large RDC values ranging from -30 to +30 Hz were observed; this is consistent with an elongated structure for EGF11-13. RDC values excluded from the fitting procedures are shown as open circles. The domain boundary is indicated by a dashed vertical line.

### Figure S3. Related to Table 2. RDC data do not support a defined interdomain interface for EGF9-EGF10

(A) The  $D_a$  and R values (14.9 and 0.48) obtained from fits of the EGF8-9 RDC data are used to obtain a best fit between experimental and calculated RDCs for EGF10-11 (only the angles  $\theta$ ,  $\phi$ ,  $\psi$  are optimised). The RDC data for EGF8-9 are represented by open circles and the RDC data for EGF10-11 by filled circles. Q values of 0.27 and 0.68 are obtained for the EGF8-9 and EGF10-11 RDCs, respectively.

(B) The  $D_a$  and R values (-8.5 and 0.38) obtained from fits of the EGF10-11 RDC data are used to obtain a best fit between experimental and calculated RDCs for EGF8-9 (only the angles  $\theta$ ,  $\phi$ ,  $\psi$  are optimised). The RDC data for EGF10-11 are represented by open circles and the RDC data for EGF8-9 by filled circles. Q values of 0.22 and 0.59 are obtained for the EGF10-11 and EGF8-9 RDCs, respectively.

### Figure S4. Related to Figure 1. SDS-PAGE of constructs used in this study

Top panels show non-reduced material, whereas the bottom panel shows reduced material. All constructs show a good degree of purity under both reducing and non-reducing conditions. The SeeBlue Plus2 Pre-Stained Standard was used as the protein standard. Electrospray ionisation mass spectrometry was performed to check the correct mass of each construct. The following were the principle human Notch1 constructs used in this study: EGF4-7 (residues Q140 to E294), EGF5-7 (residues D178 to E294), EGF7-9 (residues N257 to L372), EGF8-11 (residues D295 to I451), EGF9-11 (residues N335 to I451), EGF10-13 (N373 to P517), EGF11-13 (residues D412 to P517).

**Table S1. Related to Figure 2 and Table 2. Fits of RDC data for individual EGF domains in the constructs studied**

| Construct             | Domain | Number of measured RDCs | Number of RDCs used in fits | Q value | D <sub>a</sub> | R           |
|-----------------------|--------|-------------------------|-----------------------------|---------|----------------|-------------|
| EGF4-7 <sup>a</sup>   | EGF4   | 22                      | 20                          | 0.14    | 20.6 ± 0.6     | 0.33 ± 0.03 |
| EGF4-7 <sup>a</sup>   | EGF5   | 19                      | 19                          | 0.21    | 21.0 ± 0.8     | 0.35 ± 0.04 |
| EGF4-7 <sup>a</sup>   | EGF6   | 19                      | 17                          | 0.20    | 20.8 ± 0.6     | 0.26 ± 0.03 |
| EGF4-7 <sup>a</sup>   | EGF7   | 23                      | 20                          | 0.14    | 19.4 ± 0.6     | 0.42 ± 0.04 |
|                       |        |                         |                             |         |                |             |
| EGF7-9 <sup>b</sup>   | EGF7   | 19                      | 16                          | 0.18    | 18.3 ± 0.8     | 0.27 ± 0.03 |
| EGF7-9 <sup>b</sup>   | EGF8   | 18                      | 14                          | 0.14    | 19.1 ± 1.0     | 0.21 ± 0.05 |
|                       |        |                         |                             |         |                |             |
| EGF8-11 <sup>c</sup>  | EGF8   | 21                      | 19                          | 0.24    | 11.7 ± 0.7     | 0.41 ± 0.04 |
| EGF8-11 <sup>c</sup>  | EGF9   | 14                      | 14                          | 0.12    | 17.9 ± 0.8     | 0.50 ± 0.04 |
| EGF8-11 <sup>c</sup>  | EGF10  | 18                      | 16                          | 0.17    | -9.2 ± 0.5     | 0.52 ± 0.13 |
| EGF8-11 <sup>c</sup>  | EGF11  | 28                      | 26                          | 0.23    | -8.0 ± 0.4     | 0.37 ± 0.09 |
|                       |        |                         |                             |         |                |             |
| EGF11-13 <sup>d</sup> | EGF11  | 30                      | 25                          | 0.13    | 18.7 ± 0.5     | 0.26 ± 0.02 |
| EGF11-13 <sup>d</sup> | EGF12  | 26                      | 25                          | 0.24    | 17.6 ± 0.6     | 0.27 ± 0.03 |
| EGF11-13 <sup>d</sup> | EGF13  | 23                      | 18                          | 0.16    | 21.0 ± 0.7     | 0.26 ± 0.03 |

<sup>a</sup>For EGF4, EGF5, EGF6 and EGF7 subsets of the measured RDCs were found to agree well with predictions from the X-ray structures of individual domains. The four domains give D<sub>a</sub> and R values that are all similar suggesting that the molecule is rigid and tumbles in solution as a rigid object.

<sup>b</sup>An X-ray structure for EGF7-9 is not available. EGF7 is part of the EGF4-7 construct for which an X-ray structure exists. The coordinates of EGF7 from EGF4-7 were used to assess if the conformation of this calcium-binding domain was altered in a non-native context lacking an interdomain packing interaction in the absence of EGF6. Good agreement between experimental and calculated RDCs is obtained if residues at the N- and C-termini of EGF7, which have a different environment in EGF7-9 than in EGF4-7, are excluded. This demonstrates that the core structure of EGF7 is not altered when it is preceded or followed by EGF6 or EGF8. Alignment of the sequences of calcium-binding EGF domains for which X-ray coordinates exist with the sequence of EGF8 showed the best match for EGF11, in terms of loop length between the 1<sup>st</sup> and 2<sup>nd</sup> cysteines and between the 3<sup>rd</sup> and 4<sup>th</sup> cysteines (Figure S1). EGF11 is found to be a good model for EGF8. The EGF7 and EGF8 domains give D<sub>a</sub> and R values that are similar suggesting that the molecule is rigid and tumbles in solution as a rigid object.

<sup>c</sup>An X-ray structure for EGF8-11 is not available. The EGF8-9 pair was modelled using EGF11-12; EGF8 and EGF11 both have 6 residues in the loop between the 1<sup>st</sup> and 2<sup>nd</sup> cysteines while EGF9 and EGF12 have 4 residues in this loop (Figure S1). Both EGF8 and 9, like EGF11 and 12, are calcium-binding domains. The RDCs for EGF11 measured in the EGF8-11 construct were fitted to the X-ray structure of EGF11 in the EGF11-13 construct; residue 412, at the N-terminus, and 450, at the C-terminus, were excluded because they are found in a different context in EGF8-11 and EGF11-13. This shows that the structure of EGF11 does not change significantly when it is preceded by EGF10. On the basis of sequence alignments, EGF10 was modelled using EGF22 from the EGF21-23 X-ray structure; EGF10 and EGF22 are both non-calcium binding domains and have 4 residues in the loop between the 1<sup>st</sup> and 2<sup>nd</sup> cysteines. EGF22 is found to be a good model for EGF10.

<sup>d</sup>For EGF11, EGF12 and EGF13 subsets of the measured RDCs were found to agree well with predictions from the X-ray structures of individual domains. In EGF11, 4 of the 5 residues giving poor agreement correspond to residues at the N-terminus (D412, V413) or in the loop between the 1<sup>st</sup> and 2<sup>nd</sup> cysteines (L418, A420), which was shown to be mobile in the <sup>1</sup>H} -<sup>15</sup>N heteronuclear NOE experiment. The three domains give D<sub>a</sub> and R values that are all similar suggesting that the molecule is rigid and tumbles in solution as a rigid object.

**Table S2. Related to Figure 2 and Table 2. Fits of RDC data for EGF domain pairs in the constructs studied**

| Construct             | Domain pair | Number of RDCs used in fits | Q value (domain orientation optimized) <sup>a</sup> | D <sub>a</sub>             | R                            |
|-----------------------|-------------|-----------------------------|-----------------------------------------------------|----------------------------|------------------------------|
| EGF4-7 <sup>b</sup>   | EGF4-5      | 39                          | 0.17                                                | 20.7 ± 0.5                 | 0.34 ± 0.02                  |
| EGF4-7 <sup>b</sup>   | EGF5-6      | 36                          | 0.21                                                | 20.9 ± 0.5                 | 0.29 ± 0.02                  |
| EGF4-7 <sup>b</sup>   | EGF6-7      | 37                          | 0.17                                                | 20.3 ± 0.4                 | 0.32 ± 0.02                  |
|                       |             |                             |                                                     |                            |                              |
| EGF7-9 <sup>c</sup>   | EGF7-8      | 30                          | 0.17                                                | 18.5 ± 0.6                 | 0.26 ± 0.02                  |
|                       |             |                             |                                                     |                            |                              |
| EGF8-11 <sup>d</sup>  | EGF8-9      | 33                          | 0.27<br>(0.20) <sup>e</sup>                         | 14.9 ± 0.5<br>(18.0 ± 0.5) | 0.48 ± 0.03<br>(0.45 ± 0.02) |
| EGF8-11 <sup>f</sup>  | EGF10-11    | 42                          | 0.22                                                | -8.5 ± 0.3                 | 0.38 ± 0.08                  |
|                       |             |                             |                                                     |                            |                              |
| EGF11-13 <sup>g</sup> | EGF11-12    | 50                          | 0.19                                                | 18.2 ± 0.4                 | 0.27 ± 0.02                  |
| EGF11-13 <sup>g</sup> | EGF12-13    | 43                          | 0.21                                                | 19.1 ± 0.4                 | 0.29 ± 0.02                  |

<sup>a</sup>A subset of RDCs from a domain pair was fitted simultaneously to the X-ray structures of two EGF domains. Global values of D<sub>a</sub> and R, defining the axial component of the alignment tensor and the rhombicity, were used for all residues in the pair but the relative orientation of the domains (as defined by the Euler angles  $\theta$ ,  $\phi$ ,  $\psi$ ) was allowed to vary to optimise the fit (by minimising the Q value). The influence of experimental error of 2 Hz in the measured RDCs on the fitted parameters D<sub>a</sub>, R,  $\theta$ ,  $\phi$ ,  $\psi$  and the interdomain tilt and twist angles was assessed as described in the Supplemental Experimental Procedures.

<sup>b</sup>Fitting of the RDC data for the EGF4-5, EGF5-6 and EGF6-7 domain pairs was carried out using the X-ray structure of EGF4-7. The interdomain tilt and twist angles from the RDC data are found to be  $48^\circ \pm 3^\circ$  and  $190^\circ \pm 6^\circ$  for EGF4-5,  $70^\circ \pm 2^\circ$  and  $112^\circ \pm 7^\circ$  for EGF5-6 and  $30^\circ \pm 3^\circ$  and  $153^\circ \pm 4^\circ$  for EGF6-7. For all domain pairs, the twist angles determined from the RDC data fall within the range of values observed in the X-ray structures (Table 2). This is also true for the tilt angle determined for EGF6-7. For EGF4-5, the tilt angle is slightly higher than the range of values observed in X-ray structures. For EGF5-6, the tilt angle observed in solution is  $\sim 10^\circ$  smaller than the smallest value observed in the X-ray structures indicating that, in solution, the EGF5-6 interface is less bent.

<sup>c</sup>Fitting of the RDC data for the EGF7-8 domain pair was carried out using the X-ray structures of EGF7 (from EGF4-7) and EGF11 (from EGF11-13). The EGF7-8 tilt and twist angles determined from the RDC data are  $45^\circ \pm 2^\circ$  and  $192^\circ \pm 17^\circ$ .

<sup>d</sup>Fitting of the RDC data for the EGF8-9 domain pair was carried out using the X-ray structure of EGF11-12 (from EGF11-13). Tilt and twist angles of  $14^\circ \pm 2^\circ$  and  $142^\circ \pm 9^\circ$  are determined. The EGF11-12 pair has a tilt angle of  $14^\circ$  and a twist angle of  $120^\circ$  in the 2VJ3 X-ray structure so it is the twist of the two domains that is altered in EGF8-9.

<sup>e</sup>It is noticeable that EGF8 has a significantly lower D<sub>a</sub> value than EGF9 (Table S1). This may result from some averaging of EGF8, the N-terminal domain, with respect to the rest of the construct. If the RDC values of EGF8 are scaled up by  $\sim 1.5$  relative to those of EGF9 then the Q value for the pair decreases from 0.27 to 0.20. Interestingly, the relative orientation of the two domains is not changed significantly with tilt and twist angles of  $13^\circ \pm 2^\circ$  and  $141^\circ \pm 8^\circ$ .

<sup>f</sup>Fitting of the RDC data for the EGF10-11 domain pair was carried out using the X-ray structures of EGF11 (from EGF11-13) and EGF22 (from EGF21-23). The EGF10-11 tilt and twist angles from the RDC data are found to be  $33^\circ \pm 10^\circ$  and  $172^\circ \pm 3^\circ$ . The D<sub>a</sub> values obtained from the fits of the RDCs for EGF8-9 and EGF10-11 are significantly different in both their magnitude and sign (D<sub>a</sub> =  $14.9 \pm 0.5$  and R =  $0.48 \pm 0.03$  for EGF8-9 and D<sub>a</sub> =  $-8.5 \pm 0.3$  and R =  $0.38 \pm 0.08$  for EGF10-11). Attempts to simultaneously fit the RDC data for the four domains to a single value of D<sub>a</sub> and R gives a significantly higher Q value than the individual fits of EGF8-9 and EGF10-11. Fitting of the RDC data for EGF8-9 using the D<sub>a</sub> and R values obtained for EGF10-11 results

in a large Q value of 0.59. Similarly, fitting of the EGF10-11 RDCs using the  $D_a$  and R values for EGF8-9 results in a large Q value of 0.68 (Figure S3). This suggests that the two pairs of domains in the EGF8-11 align independently in solution.

<sup>§</sup>Fitting of the RDC data for the EGF11-12 and EGF12-13 domain pairs was carried out using the X-ray structure of EGF11-13. The interdomain tilt and twist angles between EGF11 and EGF12 were found to be  $19^\circ \pm 2^\circ$  and  $133^\circ \pm 8^\circ$ . The interdomain tilt and twist angles between EGF12 and EGF13 were found to be  $16^\circ \pm 1^\circ$  and  $149^\circ \pm 9^\circ$ . Within experimental error, the interdomain tilt and twist angles determined from the RDC data for the EGF11-13 construct fall within the range of values observed in the ensemble of X-ray structures (Table 2).

## SUPPLEMENTAL EXPERIMENTAL PROCEDURES

### NMR spectroscopy

$\{^1\text{H}\} - ^{15}\text{N}$  heteronuclear NOE experiments were carried out on  $^{15}\text{N}$ -labelled protein samples in order to examine the sub-nanosecond dynamics of specific amides (Kay et al., 1989). Spectra with and without  $^1\text{H}$  saturation were collected as interleaved experiments. The  $\{^1\text{H}\} - ^{15}\text{N}$  NOE was calculated as the ratio of the peak intensities in the spectra recorded with and without  $^1\text{H}$  saturation. Peak heights were determined using in-house peak-picking software. Uncertainties in the NOE ratios were estimated from 500 Monte Carlo simulations using baseline noise as a measure of the error in the peak heights. Data for the EGF4-7 and EGF8-11 constructs were collected at a  $^1\text{H}$  frequency of 750 MHz. Data for the EGF7-9 and EGF11-13 constructs were collected at 950 and 600 MHz, respectively.  $^1\text{H}$  saturation was applied for 4 s at 600 and 750 MHz and for 4.5 s at 950 MHz. The data sets were acquired with 1K complex points in  $F_2$  and 128 complex  $t_1$  increments. 96, 128, 96 and 80 scans were collected for EGF4-7, EGF7-9, EGF8-11 and EGF11-13, respectively.

Residual dipolar couplings (RDCs) were collected for the EGF4-7, EGF7-9, EGF8-11 and EGF11-13 constructs using liquid crystalline media containing *n*-alkyl-poly(ethylene glycols) (PEG) and *n*-alkyl alcohols as described previously (Ruckert and Otting, 2000). Isotropic spectra were first collected for protein solutions in 90%  $\text{H}_2\text{O}/10\% \text{D}_2\text{O}$ ,  $>25$  mM calcium, at pH 7.5 using the interleaved IPAP experiment (Ottiger et al., 1998). A 15% stock C12E6/*n*-hexanol solution was prepared by adding 18  $\mu\text{l}$  of *n*-hexanol to 500  $\mu\text{l}$  of a 15% C12E6 solution in 90%  $\text{H}_2\text{O}/10\% \text{D}_2\text{O}$ ,  $>25$  mM calcium at pH 7.5. Aligned protein samples were prepared by adding an appropriate aliquot of the 15% C12E6/hexanol stock to the protein solution used for the isotropic measurement. The concentration of C12E6/hexanol used for the EGF4-7, EGF7-9, EGF8-11 and EGF11-13 samples was 2.5%, 2.5%, 2.7% and 2%, respectively. IPAP experiments were performed at a  $^1\text{H}$  frequency of 600 MHz at 25 °C using 128 and 1024 complex points in  $F_1$  ( $^{15}\text{N}$ ) and  $F_2$  ( $^1\text{H}$ ), respectively. Residual dipolar couplings were measured as the difference between the splitting observed in the isotropic and aligned data sets.

### Analysis of RDC data to define interdomain orientation

RDC data were used to define the interdomain orientation in solution of pairs of EGF domains. Domain pairs extracted from the X-ray coordinates of human Notch1 EGF4-7, EGF11-13 and EGF21-23 were used in the fitting procedure. The choice of an appropriate model for fitting to the experimental RDCs was based on a sequence alignment of human Notch1 EGF domains and the number of residues between pairs of adjacent cysteines in the sequences of the domains. The number of residues between the 1<sup>st</sup> and 2<sup>nd</sup> cysteine and between the 3<sup>rd</sup> and 4<sup>th</sup> cysteine varies in the EGF domains studied here. In contrast, the number of residues between cysteines 2-3, 4-5 and 5-6 is constant (Figure S1).

Relative domain orientation was determined as follows. First, the RDC values for the individual domains were fitted to X-ray coordinates of individual EGF domains, using an in-house program, to identify a subset of residues that give a good fit (Table S1). The overall fit between experimental and calculated RDC values was assessed using the Q value, defined as:

$$Q = [\sum_{i=1, \dots, N} (\text{RDC}^{\text{expt}} - \text{RDC}^{\text{calc}})^2 / N]^{1/2} / \text{RDC}_{\text{rms}} \text{ (Cornilescu et al., 1998).}$$

Residues with very poor fits generally were located in loop regions where local structure is less conserved between EGF domains; these were excluded from further fits. In addition, residues identified as flexible on the basis of the  $\{^1\text{H}\} - ^{15}\text{N}$  heteronuclear NOE experiment were also excluded.

In the second phase, the subsets of RDCs from a pair of domains were fitted simultaneously to the X-ray structures of two EGF domains. Global values of  $D_a$  and  $R$ , defining the axial component of the alignment tensor and the rhombicity, were used for all residues in the pair but the relative orientation of the domains (as defined by the angles  $\theta$ ,  $\phi$ ,  $\psi$ ) was allowed to vary to optimise the fit (by minimising the Q value) (Table S2).

The influence of experimental error in the measured RDCs on the fitted parameters  $D_a$ ,  $R$ ,  $\theta$ ,  $\phi$ ,  $\psi$  was assessed as follows. Fits of the experimental RDCs to the X-ray structures were repeated 500 times in Monte Carlo simulations in which an experimental error of 2 Hz on the RDCs was assumed. The observed variation in the two sets of angles ( $\theta$ ,  $\phi$ ,  $\psi$ ) which define the relative orientation of the two alignment tensors, was propagated through to determine the variation in

interdomain tilt and twist angles (Table 2). These angles were calculated using the program mod2 using the positions of residues within the major  $\beta$ -hairpin as the reference point (Bork et al., 1996; Downing et al., 1996). The beginning and end of each EGF domain were defined as the residue 4 before the 1<sup>st</sup> cysteine and the residue 2 after the 6<sup>th</sup> cysteine, respectively.

A single set of RDC values will not predict a unique interdomain orientation. When an X-ray structure was used as the starting point for the RDC fitting, the optimised structure with the interdomain orientation closest to the starting X-ray structure was selected. In other cases, generally two of the possible interdomain orientations were eliminated due to steric clashes resulting from the short interdomain linker. Of the two remaining interdomain orientations, the one which gave a structure with the expected packing interaction between the aromatic residue four after the 5<sup>th</sup> cysteine in the N-terminal domain and the residues in the major  $\beta$ -term of the C-terminal domain was selected.

### Supplemental References

Bork, P., Downing, A.K., Kieffer, B., and Campbell, I.D. (1996). Structure and distribution of modules in extracellular proteins. *Q Rev Biophys* 29, 119-167.

Cornilescu, G., Marquardt, J.L., Ottiger, M., and Bax, A. (1998). Validation of protein structure from anisotropic carbonyl chemical shifts in a dilute liquid crystalline phase. *J Am Chem Soc* 120, 6836-6837.

Kay, L.E., Torchia, D.A., and Bax, A. (1989). Backbone Dynamics of Proteins as Studied by N-15 Inverse Detected Heteronuclear Nmr-Spectroscopy - Application to Staphylococcal Nuclease. *Biochemistry-U.S.* 28, 8972-8979.

Ottiger, M., Delaglio, F., and Bax, A. (1998). Measurement of J and dipolar couplings from simplified two-dimensional NMR spectra. *J Magn Reson* 131, 373-378.
